# Supplementary material for: Self-assembly of a supramolecular hexagram and a supramolecular pentagram
Source: PubMed Central journal article supplement (PMC5454539; doi:10.1038/ncomms15476), 2017-05-19
Supplement: ncomms15476-s1.pdf [file ncomms15476-s1.pdf]

## Supplementary Methods

**General Procedures.** All starting materials were purchased from Aldrich, Alfa Aesar and used without further purification. Compound **S1-S5**, **V** and **X** (see supplementary Figure 1&2) were synthesized according to the reported methods<sup>[1,2,3]</sup>, complex  $(\text{Fe}_3\text{V}_3)^{6+}$  is consistent with the results published by Ludlow III<sup>[4]</sup>. Column chromatography was conducted by using basic  $\text{Al}_2\text{O}_3$  (sinopharm chemical reagents co., Ltd, 200-300 mesh) or  $\text{SiO}_2$  (Qingdao Haiyang Chemical co., Ltd, 200-300 mesh). The  $^1\text{H}$  NMR and  $^{13}\text{C}$  NMR spectra were recorded on a Bruker Avance 400-MHz, 500-MHz and 600-MHz NMR spectrometer in  $\text{CDCl}_3$ ,  $\text{DMSO-D}_6$  and  $\text{CD}_3\text{CN}$  with TMS as the inner standard. UV-vis absorption spectra were recorded with an Agilent 8453 UV-vis Spectrometer. Photoluminescence (PL) spectra were recorded on a Hitachi 2500 Luminescence spectrometer. Transmission Electron Microscopy (TEM) was obtained on JEOL 2010. Electro-spray ionization (ESI) mass spectra were recorded with a Waters Synapt G2 tandem mass spectrometer, using solutions of 0.01mg sample in 1 mL of  $\text{CHCl}_3/\text{CH}_3\text{OH}$  (1:3, v/v) for ligand or 0.5 mg in 1 mL of MeCN, MeOH or MeCN/MeOH (3:1, v/v) for complex.

**TWIM MS.** The TWIM MS experiments were performed under the following conditions: ESI capillary voltage, 3 kV; sample cone voltage, 30 V; extraction cone voltage, 3.5 V; source temperature 100 °C; desolvation temperature, 100 °C; cone gas flow, 10 L/h; desolvation gas flow, 700 L/h ( $\text{N}_2$ ); source gas control, 0 mL/min; trap gas control, 2 mL/min; Helium cell gas control, 100 mL/min; ion mobility (IM) cell gas control, 30 mL/min; sample flow rate, 5  $\mu\text{L}/\text{min}$ ; IM traveling wave height, 25 V; and IM traveling wave velocity, 1000 m/s. Q was set in rf-only mode to transmit all ions produced by ESI into the tri-wave region for the acquisition of TWIM MS data.

**Molecular Modeling:** Energy minimization of the macrocycles was conducted with the Materials Studio version 6.0 program, using Anneal and Geometry Optimization tasks in the Materials Studio Forcite module (Accelrys, Inc.).

**STM:** The sample was dissolved in DMF or  $\text{CH}_3\text{CN}$  at a concentration of 5.0 mg/ml. Solution (5 $\mu\text{l}$ ) was dropped on HOPG surface. After 30 seconds, surface was washed slightly with water for three times and totally dried in R.T. in air. The STM images were taken with a PicoPlus SPM system with a PicoScan 3000 Controller. The obtained STM images were processed by WSxM software.<sup>S6</sup>

**AFM:** The 40N/m rectangle AFM tip was used to make markers on the surface of the sample with nanoshaving technique. The size of the markers is 10 $\mu\text{m}$ ×10 $\mu\text{m}$  and the distances between two closest markers are 30 $\mu\text{m}$ . The loading forces used are 6 $\mu\text{N}$  and shaving speed is around 5 $\mu\text{m}/\text{s}$ .

## Synthesis of the ligands and complexes

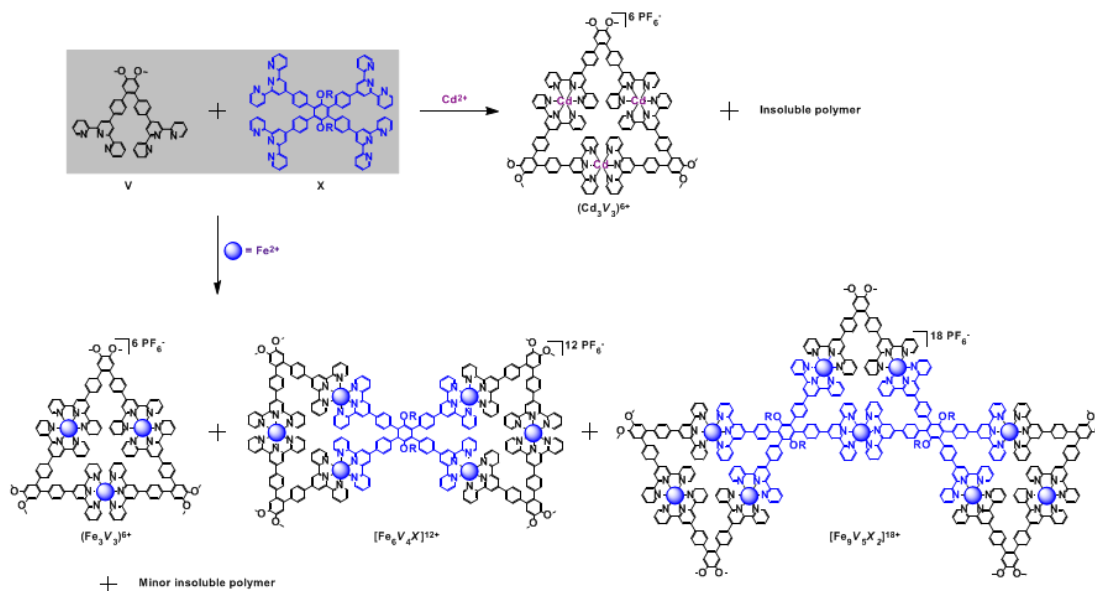

**Supplementary Figure 1:** Directly self-assembly of organic ligands V and X with  $\text{Cd}^{2+}$  or  $\text{Fe}^{2+}$ , respectively.  $\text{V}+\text{X}+\text{Cd}^{2+}$  only produced a metallo-triangle and the unidentified insoluble polymer; however,  $\text{V}+\text{X}+\text{Fe}^{2+}$  generated two separated major complexes, metallo-triangle and metallo-bowtie, and trace amount of tri-metallo-triangle, as well small amount of insoluble polymer.

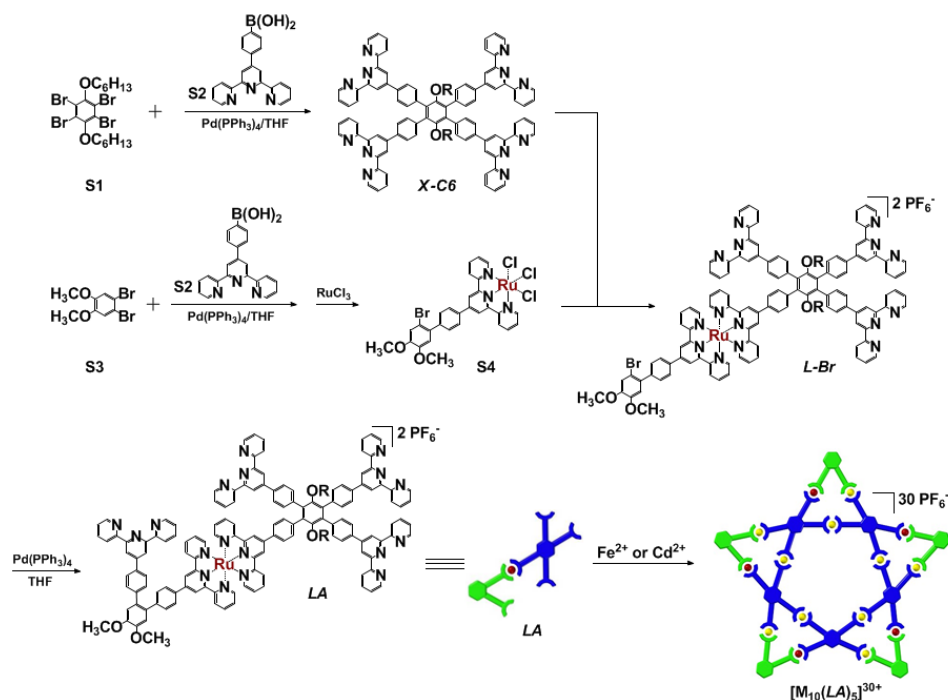

**Supplementary Figure 2:** Synthetic route of supramolecular dinuclear metallo-pentagram via predesigned terpyridinyl metallo-organic ligand LA.

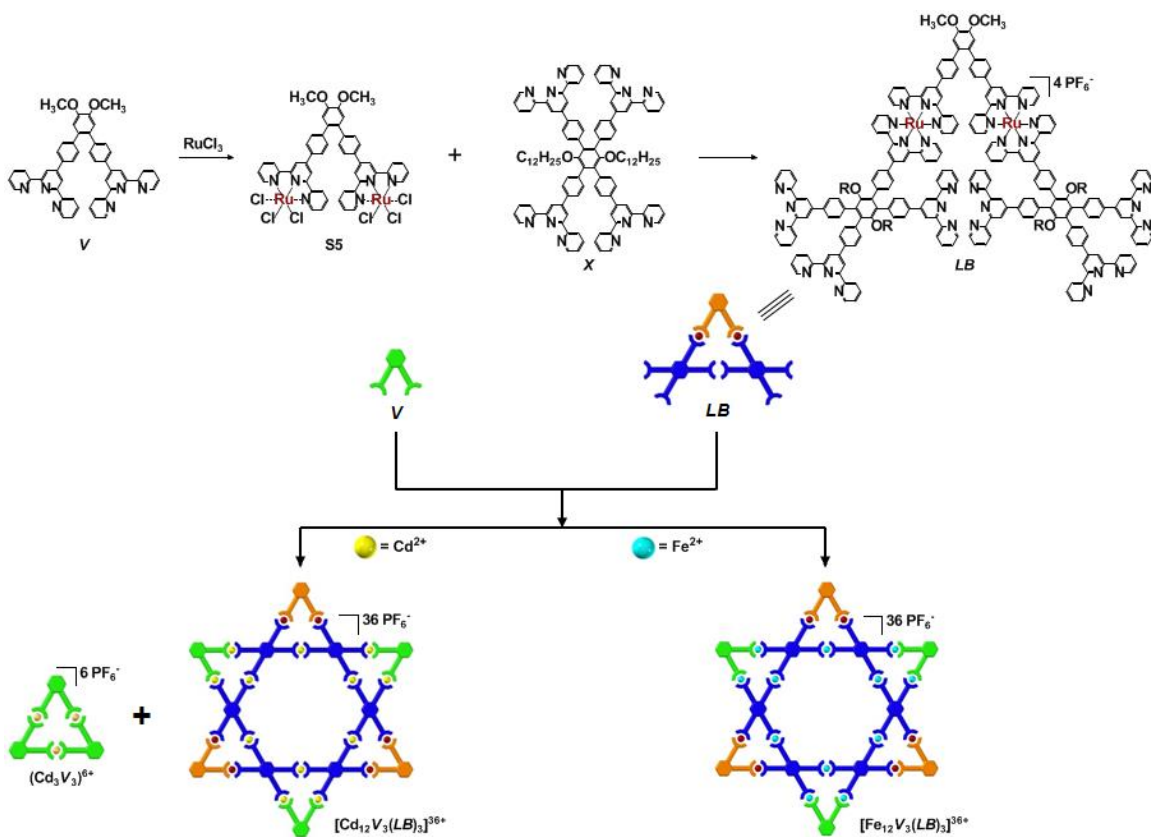

**Supplementary Figure 3:** Synthetic route of supramolecular six-star shaped hexagram *via* terpyridinyl metallo-organic ligand **LB**.

## Preparation of Ligands and Supramolecular architectures.

### 1. Compound monobromoterpyridine:

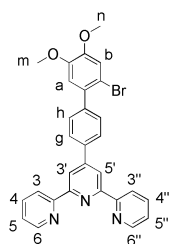

To a solution of 1, 2-dibromo-4,5-dimethoxybenzene (1.48 g, 5.0 mmol) and 4'-(4-boronatophenyl) [2,2':6',2'']terpyridine (S3, 1.78 g, 5.00 mmol) in THF (200 mL), aq.  $\text{Na}_2\text{CO}_3$  (20 mL, 1 M) was added. The mixture was freeze-pump-thawed three times and backfilled with argon; then  $\text{Pd}(\text{PPh}_3)_4$  (100 mg) was added. After refluxing for 12 hours under argon, the mixture was cooled to 25 °C and poured into aq.  $\text{NH}_4\text{Cl}$  solution. The aqueous layer was extracted with  $\text{CHCl}_3$ , and then the combined organic phase was washed with brine and dried over  $\text{MgSO}_4$ . After concentration in vacuum, the residue was purified by flash column chromatography ( $\text{Al}_2\text{O}_3$ , 200-300 mesh), eluting with  $\text{CHCl}_3$ :Petrol (2:1) to get monobromo-terpyridine as a white solid: 0.66g (25%); m.p.= 218 °C;  $^1\text{H}$  NMR (400 MHz,  $\text{CDCl}_3$ )  $\delta$  8.80 (s, 2H, 3',5'-tpyH), 8.75 (m, 2H, 6,6''-tpyH), 8.69 (m, 2H, 3,3''-tpyH), 7.99 (d, J = 8.3 Hz, 2H, ArH<sup>s</sup>), 7.88 (td, J = 7.8, 1.7 Hz, 2H, 5,5''-tpyH), 7.70 (d, J = 8.3 Hz, 2H, ArH<sup>s</sup>), 7.39 (m, 4.8, 2H, 4,4''-tpyH), 6.98 (s, 1H, ArH<sup>b</sup>), 6.96 (s, 1H, ArH<sup>a</sup>), 4.00 (s, 3H, -OMe<sup>m</sup>), 3.94 (s, 3H, -OMe<sup>n</sup>).  $^{13}\text{C}$  NMR (100 MHz,  $\text{CDCl}_3$ )  $\delta$  156.27, 155.95, 149.73, 149.11, 141.65, 136.83, 127.25, 123.84, 121.39, 119.51, 118.61, 111.54, 110.32, 77.41, 77.10, 76.78, 56.01. ESI/MS (solvent:  $\text{CHCl}_3$ : MeOH=1:3, m/z): 524.2  $[\text{M}+\text{H}]^+$ , Calculated  $[\text{M}+\text{H}]^+$ : 524.1.

### 2. Complex S4

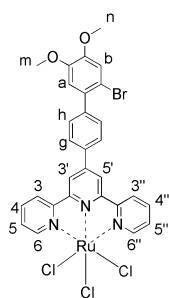

Compound monobromo-terpyridine (262 mg, 0.5 mmol) and  $\text{RuCl}_3 \cdot 3\text{H}_2\text{O}$  (148 mg, 0.55 mmol) was suspended in EtOH (100 mL), The mixture were refluxed for 12 hours, then cooled to 25 °C and filtered to obtain a brown powder. The solid was washed with MeOH repeatedly until the filtrate get clean and colorless, the solid was collected and dried in vacuum for 12 hours to get the 200 mg desired red powder with the yield of 75%, it was used directly for the next step without further purification. m.p.>320 °C; Elemental Anal. Calcd. for  $\text{C}_{29}\text{H}_{22}\text{BrN}_3\text{O}_2\text{RuCl}_3 \cdot 3\text{H}_2\text{O}$ : C, 44.32; H, 3.59; N, 5.35. Found: C, 43.98; H, 3.62; N, 5.31.

### 3. Complex L-Br

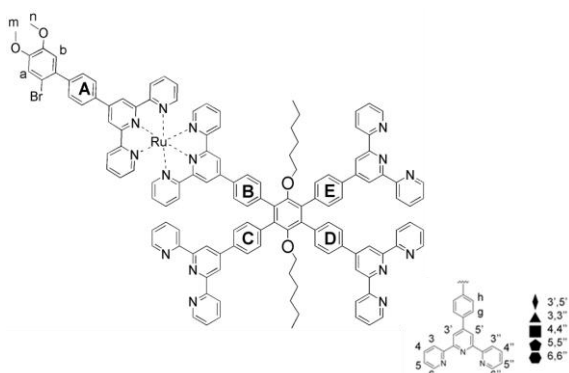

To a solution of **S4** (36.1 mg, 0.05 mmol) and **X** (150.6 mg, 0.1 mmol) in  $\text{CHCl}_3/\text{MeOH}$  (100 mL, 1:1 v/v) together with 5 drops of N-ethylmorpholine as a reducing agent, the mixture was refluxed for 12 hours. The mixture was cooled to 25 °C and the solvent was removed under vacuum. The residue was

extracted with  $\text{CHCl}_3$ , and then the combined organic phase was washed with brine and dried over  $\text{MgSO}_4$ . After concentration in vacuum, the residue was purified by flash column chromatography [ $\text{Al}_2\text{O}_3$  200-300 mesh, eluting with  $\text{CHCl}_3:\text{MeOH}$  (40:1, v/v)] to get **L-Br** as a red powder: 55mg (yield: 50%); m.p. >320 °C;  $^1\text{H}$  NMR (500 MHz,  $\text{CDCl}_3$ )  $\delta$  9.49 (s,  $\text{tpy}^{\text{A}}\text{H}^{3',5'}$ , 2H), 9.24 (d,  $J = 8.3$  Hz,  $\text{tpy}^{\text{A}}\text{H}^{3,3''}$ , 2H), 9.16 (s,  $\text{tpy}^{\text{B}}\text{H}^{3',5'}$ , 2H), 8.91 (d,  $J = 8.2$  Hz,  $\text{tpy}^{\text{B}}\text{H}^{3,3''}$ , 2H), 8.78-8.76 (m, 6H,  $\text{tpy}^{\text{C}}\text{H}^{3',5'}$ ,  $\text{tpy}^{\text{D}}\text{H}^{3',5'}$ ,  $\text{tpy}^{\text{E}}\text{H}^{3',5'}$ ), 8.70 (m,  $\text{tpy}^{\text{C}}\text{H}^{6,6''}$ ,  $\text{tpy}^{\text{D}}\text{H}^{6,6''}$ ,  $\text{tpy}^{\text{E}}\text{H}^{6,6''}$ , 6H), 8.66 (m,  $\text{tpy}^{\text{C}}\text{H}^{3,3''}$ ,  $\text{tpy}^{\text{D}}\text{H}^{3,3''}$ ,  $\text{tpy}^{\text{E}}\text{H}^{3,3''}$ , 6H), 8.56 (d,  $J = 8.3$  Hz,  $\text{tpy}^{\text{A}}\text{H}^{\text{g}}$ , 2H), 8.25 (d,  $J = 8.3$  Hz,  $\text{tpy}^{\text{B}}\text{H}^{\text{g}}$ , 2H), 7.97 (m,  $\text{tpy}^{\text{A}}\text{H}^{4,4''}$ ,  $\text{tpy}^{\text{B}}\text{H}^{4,4''}$ , 4H), 7.87 (m,  $\text{tpy}^{\text{C}}\text{H}^{\text{h}}$ ,  $\text{tpy}^{\text{D}}\text{H}^{\text{h}}$ ,  $\text{tpy}^{\text{E}}\text{H}^{\text{h}}$ ,  $\text{tpy}^{\text{C}}\text{H}^{4,4''}$ ,  $\text{tpy}^{\text{D}}\text{H}^{4,4''}$ ,  $\text{tpy}^{\text{E}}\text{H}^{4,4''}$ , 12H), 7.80 (d,  $J = 8.3$  Hz,  $\text{tpy}^{\text{A}}\text{H}^{\text{h}}$  2H), 7.71 (d,  $J = 8.2$  Hz,  $\text{tpy}^{\text{b}}\text{H}^{\text{h}}$ , 2H), 7.54 (d,  $J = 8.3$  Hz,  $\text{tpy}^{\text{C}}\text{H}^{\text{g}}$  2H), 7.50 (m,  $\text{tpy}^{\text{D}}\text{H}^{\text{g}}$ ,  $\text{tpy}^{\text{E}}\text{H}^{\text{g}}$  4H), 7.45 (d,  $J = 5.0$  Hz,  $\text{tpy}^{\text{A}}\text{H}^{6,6''}$  2H), 7.40 (d,  $J = 5.1$  Hz,  $\text{tpy}^{\text{C}}\text{H}^{6,6''}$ , 2H), 7.34 (m,  $\text{tpy}^{\text{B}}\text{H}^{6,6''}$ ,  $\text{tpy}^{\text{C}}\text{H}^{6,6''}$ ,  $\text{tpy}^{\text{D}}\text{H}^{6,6''}$ ,  $\text{tpy}^{\text{E}}\text{H}^{6,6''}$ ,  $\text{tpy}^{\text{F}}\text{H}^{6,6''}$ , 8H), 7.21 (dd,  $J = 11.8, 4.7$  Hz,  $\text{tpy}^{\text{A}}\text{H}^{6,6''}$  2H), 7.19 (s,  $\text{tpy}^{\text{A}}\text{H}^{\text{j}}$ , 1H), 7.00 (s,  $\text{tpy}^{\text{A}}\text{H}^{\text{k}}$ , 1H), 3.98 (s,  $\text{H}^{\text{OMe}}$ , 3H), 3.96 (s,  $\text{H}^{\text{OMe}}$ , 3H), 3.18 (t,  $J = 6.1$  Hz,  $\text{H}^{\text{OCH}_2\text{R}}$ , 2H), 3.14 (t,  $J = 6.2$  Hz,  $\text{H}^{\text{OCH}_2\text{R}}$ , 2H), 1.30 (m, 6H), 1.02 (m, 4H), 0.85 (m, 6H), 0.63 (dt,  $J = 16.4, 7.3$  Hz, 6H).  $^{13}\text{C}$  NMR (125 MHz,  $\text{CDCl}_3$ )  $\delta$  158.21, 157.95, 156.55, 155.85, 155.10, 155.10, 152.08, 151.35, 149.07, 148.97, 138.52, 138.24, 137.75, 137.04, 136.77, 136.49, 136.13, 135.56, 135.06, 132.86, 132.61, 132.18, 131.86, 131.00, 129.66, 128.05, 127.85, 126.95, 126.32, 125.84, 125.30, 123.91, 123.67, 122.42, 121.80, 121.49, 121.31, 118.88, 56.33, 31.40, 31.33, 29.84, 29.69, 29.35, 29.24, 25.40, 25.29, 22.68, 22.58, 22.47, 14.03, 13.96, 13.87. HR-MS (solvent:  $\text{CHCl}_3:\text{MeOH}=1:3$ , m/z): 1066.80  $[\text{M}-2\text{Cl}]^{2+}$ , calculated:  $[\text{M}-2\text{Cl}]^{2+}=1066.65$ , 711.53  $[\text{M}+\text{H}-2\text{Cl}]^{3+}$ , calculated:  $[\text{M}+\text{H}-2\text{Cl}]^{3+}=711.43$ .

#### 4. Complex LA:

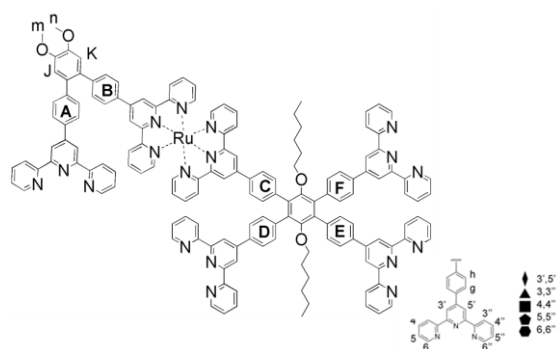

To a solution of **L-Br** (21.3 mg, 0.01 mmol) and 4'-(4-boronatophenyl) [2, 2':6', 2''] terpyridine (**S2**, 35.4 mg, 0.1 mmol) in DMSO (20 mL), aq. Na<sub>2</sub>CO<sub>3</sub> (0.5 mL, 1 M) was added. The mixture was freeze-pump-thawed three times and backfilled with argon; then

Pd(PPh<sub>3</sub>)<sub>4</sub> (5 mg) was added. After refluxing for 24 hours under argon, the mixture was cooled to 25 °C and poured into an aq. NH<sub>4</sub>Cl solution. The aqueous layer was extracted with CHCl<sub>3</sub>, and then the combined organic phase was washed with brine and dried over MgSO<sub>4</sub>. After concentration in vacuum, the residue was purified by flash column chromatography [Al<sub>2</sub>O<sub>3</sub>, 200-300 mesh, eluting with CHCl<sub>3</sub>:MeOH (40:1)] to get **LA** as a red solid: 12 mg (yield: 48%). m. p. >320 °C; <sup>1</sup>H NMR (500 MHz, CDCl<sub>3</sub>) δ 9.28 (s, tpy<sup>A</sup>H<sup>3',5'</sup>, 2H), 9.08 (s, tpy<sup>B</sup>H<sup>3',5'</sup>, 2H), 9.04 (d, J = 8.4 Hz, tpy<sup>A</sup>H<sup>3,3''</sup>, 2H), 8.83 (d, J = 8.0 Hz, tpy<sup>B</sup>H<sup>3,3''</sup>, 2H), 8.75 (m, tpy<sup>C</sup>H<sup>3',5'</sup>, tpy<sup>D</sup>H<sup>3',5'</sup>, tpy<sup>E</sup>H<sup>3',5'</sup>, tpy<sup>F</sup>H<sup>3',5'</sup>, 8H), 8.70 (m, tpy<sup>C</sup>H<sup>6,6''</sup>, tpy<sup>D</sup>H<sup>6,6''</sup>, 4H), 8.65 (m, tpy<sup>E</sup>H<sup>6,6''</sup>, tpy<sup>F</sup>H<sup>6,6''</sup>, tpy<sup>C</sup>H<sup>3,3''</sup>, tpy<sup>D</sup>H<sup>3,3''</sup>, tpy<sup>E</sup>H<sup>3,3''</sup>, tpy<sup>F</sup>H<sup>3,3''</sup>, 12H), 8.33 (d, J = 8.3 Hz, tpy<sup>A</sup>H<sup>g</sup>, 2H), 8.23 (d, J = 8.2 Hz, tpy<sup>B</sup>H<sup>g</sup>, 2H), 7.88 (m, tpy<sup>A</sup>H<sup>4,4''</sup>, tpy<sup>B</sup>H<sup>4,4''</sup>, tpy<sup>C</sup>H<sup>4,4''</sup>, tpy<sup>D</sup>H<sup>4,4''</sup>, tpy<sup>E</sup>H<sup>4,4''</sup>, tpy<sup>F</sup>H<sup>4,4''</sup>, tpy<sup>C</sup>H<sup>g</sup>, tpy<sup>D</sup>H<sup>g</sup>, tpy<sup>E</sup>H<sup>g</sup>, tpy<sup>F</sup>H<sup>g</sup>, 18H), 7.70 (d, J = 8.2 Hz, tpy<sup>A</sup>H<sup>h</sup>, 2H), 7.54 (t, J = 8.4 Hz, tpy<sup>B</sup>H<sup>h</sup>, 4H), 7.50 (m, tpy<sup>C</sup>H<sup>h</sup>, tpy<sup>D</sup>H<sup>h</sup>, tpy<sup>E</sup>H<sup>h</sup>, 8H), 7.37 (m, tpy<sup>A</sup>H<sup>5,5''</sup>, tpy<sup>B</sup>H<sup>5,5''</sup>, tpy<sup>C</sup>H<sup>5,5''</sup>, tpy<sup>D</sup>H<sup>5,5''</sup>, tpy<sup>E</sup>H<sup>5,5''</sup>, tpy<sup>F</sup>H<sup>5,5''</sup>, 12H), 7.18 (m, tpy<sup>A</sup>H<sup>6,6''</sup>, tpy<sup>B</sup>H<sup>6,6''</sup>, 4H), 7.15 (s, tpy<sup>A</sup>H<sup>m</sup>, 1H), 7.06 (s, tpy<sup>A</sup>H<sup>n</sup>, 1H), 6.93 (d, J = 8.4 Hz, tpy<sup>F</sup>H<sup>h</sup>, 2H), 4.06 (s, H<sup>OMe</sup>, 3H), 4.04 (s, H<sup>OMe</sup>, 3H), 3.18 (t, J = 6.1 Hz, H<sup>OCH<sub>2</sub>R</sup>, 2H), 3.13 (t, J = 6.1 Hz, H<sup>OCH<sub>2</sub>R</sup>, 2H), 1.30 (m, 11H), 1.00 (m, 6H), 0.85 (m, 10H), 0.61 (dd, J = 13.8, 7.2 Hz, 6H). <sup>13</sup>C NMR (125 MHz, CDCl<sub>3</sub>) δ 158.68, 158.11, 157.94, 156.37, 156.14, 155.95, 155.82, 155.61, 154.95, 151.74, 151.19, 151.06, 150.01, 149.78, 149.06, 148.98, 148.87, 148.82, 148.70, 138.29, 138.10, 137.74, 137.07, 136.93, 136.79, 136.42, 136.06, 135.89, 135.59, 135.11, 133.95, 132.88, 132.53, 132.23, 132.11, 131.98, 131.38, 130.72, 127.84, 127.84, 127.00, 126.42, 125.69, 125.26, 123.90, 123.68, 121.76, 121.48, 121.32, 118.89, 118.68, 117.88, 116.36, 113.72, 56.35, 56.22, 31.43, 31.38, 31.33, 30.20, 29.80, 29.73, 29.68, 25.38, 25.32, 22.67, 22.56, 22.46, 14.09, 14.00, 13.86. HR-MS (solvent: CHCl<sub>3</sub>:MeOH=1:3, m/z): 1180.95 [M-2Cl]<sup>2+</sup>, calculated:

$$[M-2Cl]^{2+}=1180.88, 787.63 [M+H-2Cl]^{3+}, \text{ calculated: } [M+H-2Cl]^{3+}=787.58.$$

## 5. Complex **LB**

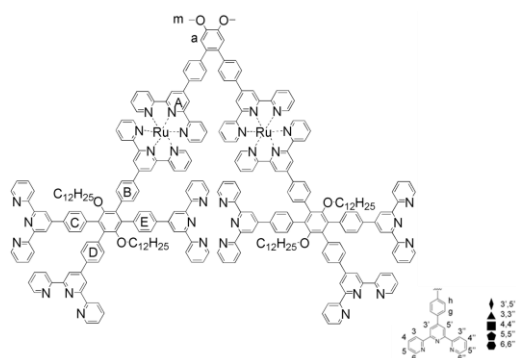

To a suspension of **S5** (29.1 mg, 0.025 mmol) and **X** (125.7 mg, 0.075 mmol) in  $CHCl_3/MeOH$  (250 mL, 1:1 v/v), with 5 drops of N-methylmorpholine as a reducing agent, the mixture was refluxed for 12 hours. The mixture was cooled to 25 °C and the solvent was removed under vacuum. The residue was extracted on with  $CHCl_3$  for 3 times, and then

the combined organic phase was washed with brine and dried over  $MgSO_4$ . After concentration in vacuum, then purified by flash column chromatography [ $Al_2O_3$ , 200-300 mesh, eluting with  $CHCl_3:MeOH$  (20:1)] to get **LB** as a red powder: 32 mg (yield: 30%); m.p. >320 °C;  $^1H$  NMR (500 MHz,  $CDCl_3$ )  $\delta$  9.52 (s,  $tpy^A H^{3',5'}$ , 4H), 9.35 (d,  $tpy^A H^{3,3''}$ ,  $J = 8.2$  Hz, 4H), 9.08 (s,  $tpy^B H^{3',5'}$ , 4H), 8.83 (d,  $tpy^B H^{3,3''}$ ,  $J = 8.3$  Hz, 4H), 8.76 (m,  $tpy^C H^{3',5'}$ ,  $tpy^D H^{3',5'}$ ,  $tpy^E H^{3',5'}$ , 12H), 8.70 (m,  $J = 4.0$  Hz,  $tpy^C H^{6,6''}$ ,  $tpy^D H^{6,6''}$ ,  $tpy^E H^{6,6''}$ , 12H), 8.65 (m,  $tpy^C H^{3,3''}$ ,  $tpy^D H^{3,3''}$ ,  $tpy^E H^{3,3''}$ , 12H), 8.35 (d,  $J = 8.2$  Hz,  $tpy^A H^g$ , 4H), 8.19 (d,  $J = 8.2$  Hz,  $tpy^B H^g$ , 4H), 7.95 (m,  $tpy^A H^{5,5''}$ ,  $tpy^B H^{5,5''}$ , 8H), 7.86 (m,  $tpy^C H^g$ ,  $tpy^D H^g$ ,  $tpy^E H^g$ ,  $tpy^C H^{5,5''}$ ,  $tpy^D H^{5,5''}$ ,  $tpy^E H^{5,5''}$ , 24H), 7.70 (d,  $J = 8.2$  Hz,  $tpy^A H^h$ , 4H), 7.58 (d,  $J = 8.2$  Hz,  $tpy^B H^h$ , 4H), 7.52 (m,  $tpy^C H^h$ ,  $tpy^D H^h$ ,  $tpy^E H^h$ , 12H), 7.49 (m,  $tpy^A H^{3,3''}$ ,  $tpy^B H^{3,3''}$ , 8H), 7.42 (m,  $tpy^A H^{6,6''}$ , 4H), 7.33 (m,  $tpy^B H^{6,6''}$ ,  $tpy^C H^{5,5''}$ ,  $tpy^D H^{5,5''}$ ,  $tpy^E H^{5,5''}$ , 16H), 7.25 (m,  $tpy^A H^{5,5''}$ , 4H), 7.15 (m,  $tpy^B H^{5,5''}$ ,  $tpy^A H^m$ , 6H), 4.05 (s, OMe, 6H), 3.18 (s,  $OCH_2R$ , 4H), 3.13 (s,  $OCH_2R$ , 2H), 1.30 (dt,  $J = 34.0, 16.9$  Hz, 12H), 1.11 (ddd,  $J = 23.3, 14.3, 7.0$  Hz, 3H), 0.93 (m, 21H), 0.76 (dt,  $J = 18.2, 7.3$  Hz, 6H).  $^{13}C$  NMR (125 MHz,  $CDCl_3$ )  $\delta$  158.32, 157.68, 156.35, 156.10, 155.81, 155.17, 155.00, 151.20, 149.92, 149.03, 148.93, 139.27, 137.72, 137.14, 136.77, 136.40, 135.93, 135.62, 135.00, 132.93, 131.98, 131.27, 128.80, 128.31, 126.41, 123.96, 123.67, 122.58, 121.51, 121.31, 118.82, 118.78, 118.64, 114.05, 56.36, 33.80, 31.91, 31.77, 31.75, 31.50, 31.43, 31.37, 30.20, 30.14, 29.86, 29.68, 29.56, 29.53, 29.47, 29.34, 29.24, 29.19, 29.14, 28.95, 27.21, 25.70, 25.66, 23.77, 22.97, 22.67, 22.58, 22.55, 14.08, 14.03, 10.94. HR-MS(solvent:  $CHCl_3:MeOH=1:3$ , m/z): 1447.60  $[M-3Cl]^{3+}$ , calculated:  $[M-3Cl]^{3+}$ : 1447.57,  $[M-3Cl+H]^{4+}$ : 1085.97, calculated:  $[M-3Cl+H]^{4+}$ : 1085.93;  $[M-4Cl+H]^{5+}$ : 861.78, calculated:  $[M-4Cl+H]^{5+}$ : 861.66;  $[M-4Cl+2H]^{6+}$ : 718.14, calculated:  $[M-4Cl+2H]^{6+}$ : 717.88.

## 6. Complex of ligand *V* and *X* with $\text{Fe}^{2+}$ :

Ligand *V* (15.2 mg, 17.0  $\mu\text{mol}$ ), *X* (25.6 mg, 17.0  $\mu\text{mol}$ ) and  $\text{FeSO}_4 \cdot 7\text{H}_2\text{O}$  (14.1 mg, 51.0  $\mu\text{mol}$ ) were dissolved in 40 ml ethylene glycol. The solution was heated at  $140^\circ\text{C}$  for 2 days under  $\text{N}_2$  protection. The solution was cooled down and added into a 60 ml methanol solution with 1.0 g  $\text{NH}_4\text{PF}_6$ . The precipitate was filtered and residue was flash column chromatographed ( $\text{SiO}_2$ ) eluting with  $\text{MeCN}/\text{sat. KNO}_3(\text{aq})$  (100:0-100:12) to generate three major fractions as the purple precipitates, after then the counterion was exchanged to  $\text{PF}_6^-$  again.

### 6.1. Metallo-triangle ( $\text{Fe}_3\text{V}_3$ ) $^{6+}$ :<sup>[4]</sup>

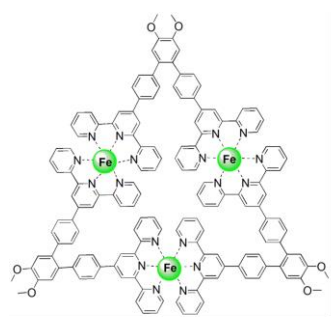

m. p.  $> 320^\circ\text{C}$ ,  $^1\text{H NMR}$  (400 MHz,  $\text{CD}_3\text{CN}$ )  $\delta$  9.19 (s, 4H,  $\text{tpy-H}^{3',5'}$ ), 8.61 (d,  $J = 7.2$  Hz, 4H,  $\text{tpy-H}^{3,3''}$ ), 8.27 (d,  $J = 7.5$  Hz, 4H,  $\text{Ph-H}^e$ ), 7.82 (d,  $J = 6.9$  Hz, 4H,  $\text{tpy-H}^{4,4''}$ ), 7.71 (d,  $J = 6.8$  Hz, 4H,  $\text{Ph-H}^h$ ), 7.32 (s, 2H,  $\text{Ph-H}^m$ ), 7.22 (d,  $J = 31.9$  Hz, 4H,  $\text{tpy-H}^{6,6''}$ ), 7.04 (m, 4H,  $\text{tpy-H}^{5,5''}$ ), 4.03 (d,  $J = 23.3$  Hz, 6H,  $-\text{OCH}_3$ ).  $^{13}\text{C NMR}$  (100 MHz,  $\text{CD}_3\text{CN}$ )  $\delta$  160.25,

158.04, 153.01, 149.86, 149.35, 143.90, 138.66, 134.81, 132.08, 131.45, 127.57, 127.33, 123.86, 121.46, 114.22, 63.17. ESI MS ( $\text{CD}_3\text{CN}$  as solvent,  $m/z$ ): 1502.8 [ $\text{M}-2\text{PF}_6^-$ ] $^{2+}$  (calcd  $m/z$ : 1502.8), 953.7 [ $\text{M}-3\text{PF}_6^-$ ] $^{3+}$  (calcd  $m/z$ : 953.7), 678.9 [ $\text{M}-4\text{PF}_6^-$ ] $^{4+}$  (calcd  $m/z$ : 678.9), 514.2 [ $\text{M}-5\text{PF}_6^-$ ] $^{5+}$  (calcd  $m/z$ : 514.2) and 404.4 [ $\text{M}-6\text{PF}_6^-$ ] $^{6+}$  (calcd  $m/z$ : 404.4).

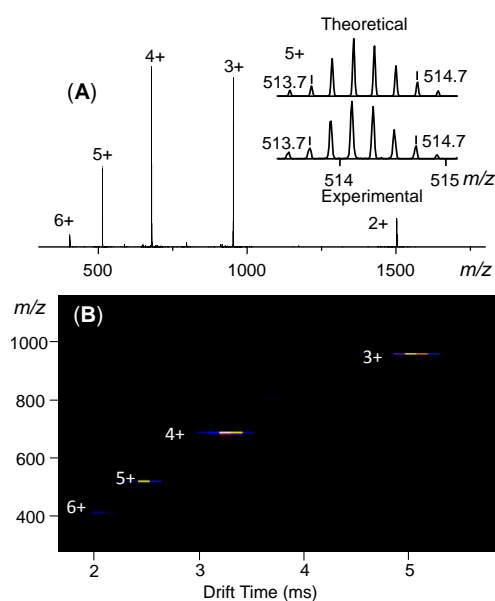

**Supplementary Figure 3.1:** (A) ESI-MS and (B) 2D TWIM-MS plot ( $m/z$  vs drift time) of



$[\text{Fe}_3\text{V}_3]^{6+}$  ( $\text{PF}_6^-$  as counterion). The charge states of intact assemblies are marked.

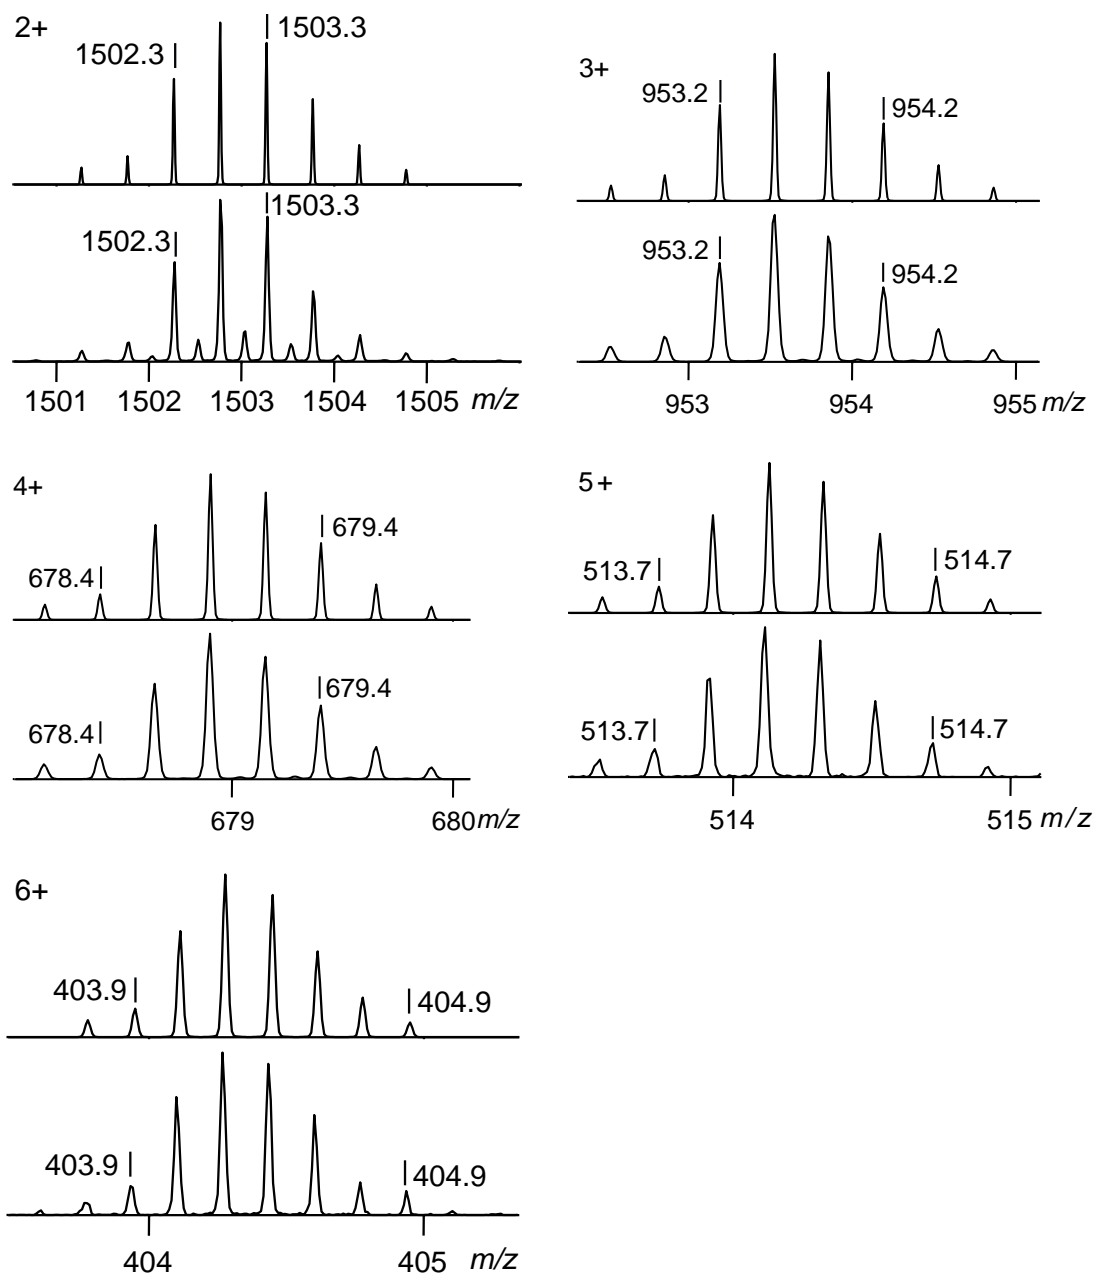

**Supplementary Figure 4:** Measured (bottom) and calculated (top) isotope patterns for different charge states observed from  $[\text{Fe}_3\text{V}_3]^{6+}$  ( $\text{PF}_6^-$  as counterion,  $\text{CD}_3\text{CN}$  as solvent).

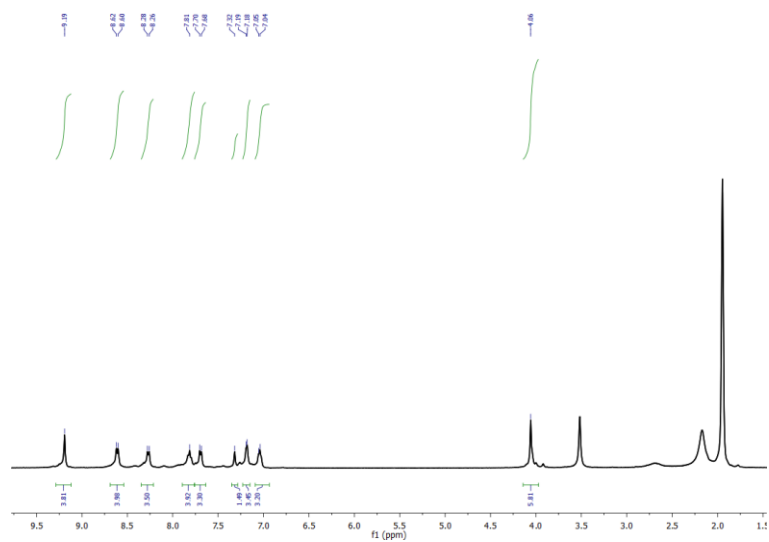

**Supplementary Figure 5.**  $^1\text{H}$  NMR (400 MHz,  $\text{CD}_3\text{CN}$  as solvent) spectrum of complex  $[\text{Fe}_3\text{V}_3]^{6+}$  ( $\text{PF}_6^-$  as counterion).

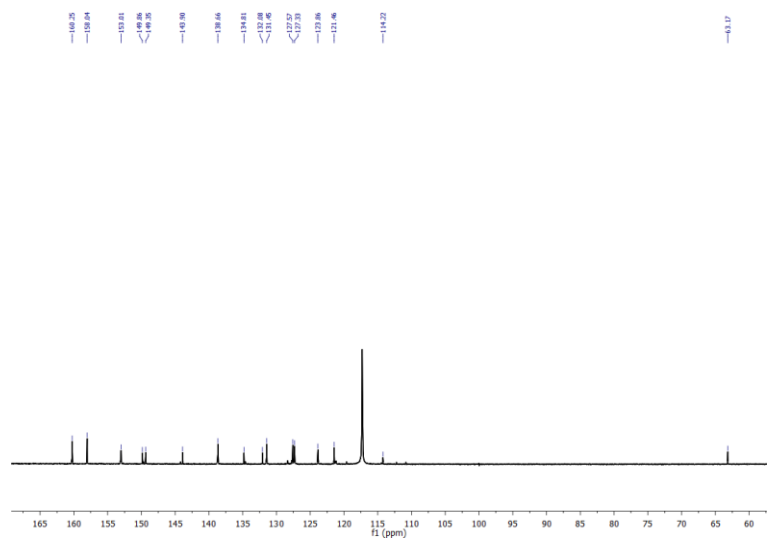

**Supplementary Figure 6.**  $^{13}\text{C}$  NMR (400 MHz,  $\text{CD}_3\text{CN}$  as solvent) spectrum of complex  $[\text{Fe}_3\text{V}_3]^{6+}$  ( $\text{PF}_6^-$  as counterion).

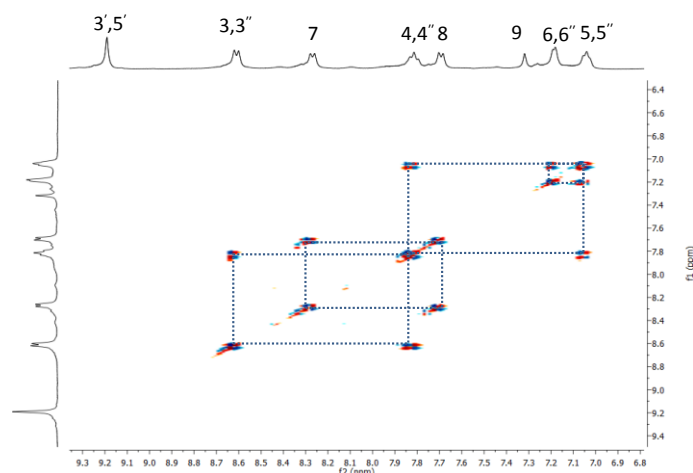

**Supplementary Figure 7.** 2D COSY NMR (400 MHz, CD<sub>3</sub>CN) spectrum of complex [Fe<sub>3</sub>V<sub>3</sub>]<sup>6+</sup> (PF<sub>6</sub><sup>-</sup> as counterion) (aromatic region).

### 2.6.2. Metallo-bowtie [Fe<sub>6</sub>V<sub>4</sub>X]<sup>12+</sup>.<sup>[4]</sup>

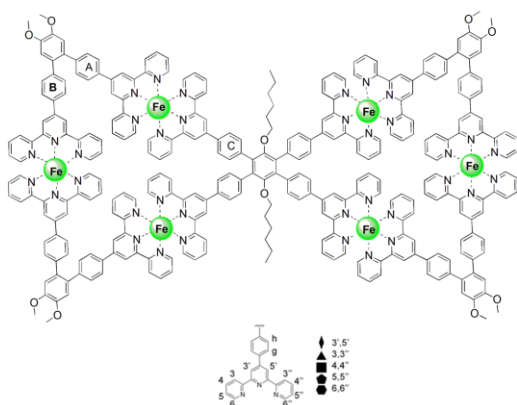

m.p.: > 320°C; <sup>1</sup>H NMR (600 MHz, CD<sub>3</sub>CN) δ 9.26 (s, 4H, tpy-*H*<sup>3',5'</sup>), 9.25 (s, 4H, tpy-*H*<sup>a3',5'</sup>), 9.24 (s, 4H, tpy-*H*<sup>b3',5'</sup>), 8.66 (m, 12H, tpy-*H*<sup>3,3''</sup>, tpy-*H*<sup>a3,3''</sup> and tpy-*H*<sup>b3,3''</sup>), 8.42 (d, *J* = 7.9 Hz, 4H, Ph-*H*<sup>7</sup>), 8.30 (d, *J* = 8.2 Hz, 8H, Ph-*H*<sup>a7</sup> and Ph-*H*<sup>b7</sup>), 7.93 (d, *J* = 8.2 Hz, 4H, Ph-*H*<sup>8</sup>), 7.85 (m, 12H, tpy-*H*<sup>4,4''</sup>, tpy-*H*<sup>a4,4''</sup> and tpy-*H*<sup>b4,4''</sup>), 7.73 (dd, *J* = 8.1, 2.2 Hz, 8H, Ph-*H*<sup>a8</sup> and Ph-*H*<sup>b8</sup>), 7.35 (d, *J* = 5.3 Hz, 4H, Ph-*H*<sup>a9</sup> and Ph-*H*<sup>b9</sup>), 7.23 (d, *J* = 5.6 Hz, 8H, tpy-*H*<sup>a6,6''</sup> and tpy-*H*<sup>b6,6''</sup>), 7.21 (d, *J* = 5.6 Hz, 4H, tpy-*H*<sup>6,6''</sup>), 7.09 (m, 8H, tpy-*H*<sup>a5,5''</sup> and tpy-*H*<sup>b5,5''</sup>), 7.07 – 7.04 (m, 4H, tpy-*H*<sup>5,5''</sup>), 4.10 (s, 12H, -OCH<sub>3</sub>-*H*<sup>10</sup>), 3.49 (t, *J* = 4.8 Hz, 4H, Alkyl-*H*<sup>11</sup>), 1.24 (m, 8H, Alkyl-*H*<sup>12</sup> and Alkyl-*H*<sup>15</sup>), 1.10 – 1.02 (m, 8H, Alkyl-*H*<sup>13</sup> and Alkyl-*H*<sup>14</sup>), 0.80 (t, *J* = 7.3 Hz, 6H, Alkyl-*H*<sup>16</sup>). <sup>13</sup>C NMR (150 MHz, CD<sub>3</sub>CN) δ 160.33, 160.26, 160.21, 158.03, 153.01, 151.36, 149.92, 149.69, 149.34, 143.91, 143.85, 139.43, 138.67, 135.96, 135.12, 134.87, 134.78, 132.76, 132.03, 132.00, 131.47, 127.60, 127.54, 127.32, 127.05, 123.88, 121.54, 121.52, 121.30, 114.17, 73.45, 55.82, 31.25, 29.68, 25.37, 22.56, 13.56. ESI MS (CD<sub>3</sub>CN as solvent, *m/z*): 1503.5 [M-4PF<sub>6</sub>]<sup>4+</sup> (calcd *m/z*: 1503.5), 1173.9 [M-5PF<sub>6</sub>]<sup>5+</sup> (calcd *m/z*: 1173.9), 954.0 [M-6PF<sub>6</sub>]<sup>6+</sup> (calcd *m/z*: 954.0), 797.1 [M-7PF<sub>6</sub>]<sup>7+</sup> (calcd *m/z*: 797.1), 679.3 [M-8PF<sub>6</sub>]<sup>8+</sup> (calcd *m/z*: 679.3), 587.8 [M-9PF<sub>6</sub>]<sup>9+</sup> (calcd *m/z*: 587.8), 514.4 [M-10PF<sub>6</sub>]<sup>10+</sup> (calcd *m/z*: 514.4)

and 454.6 [M-11PF<sub>6</sub>]<sup>11+</sup> (calcd *m/z*: 454.6).

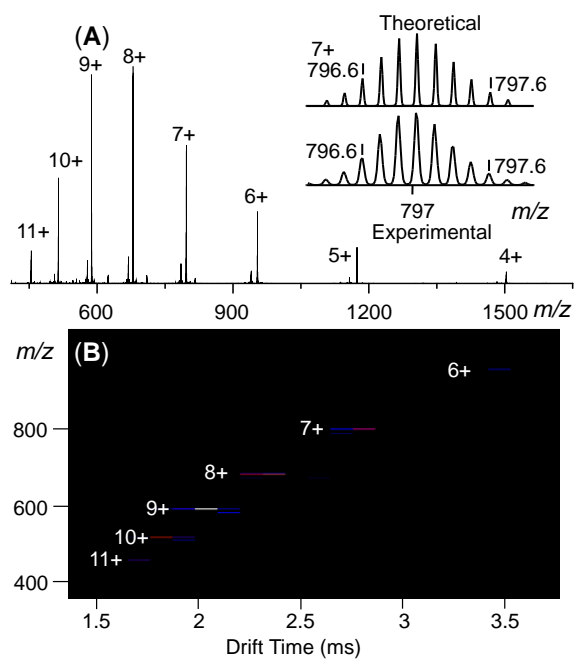

**Supplementary Figure 8:** (A) ESI-MS and (B) 2D TWIM-MS plot (*m/z* vs drift time) of metallo-bowtie [Fe<sub>6</sub>V<sub>4</sub>X]<sup>12+</sup>. The charge states of intact assemblies are marked.

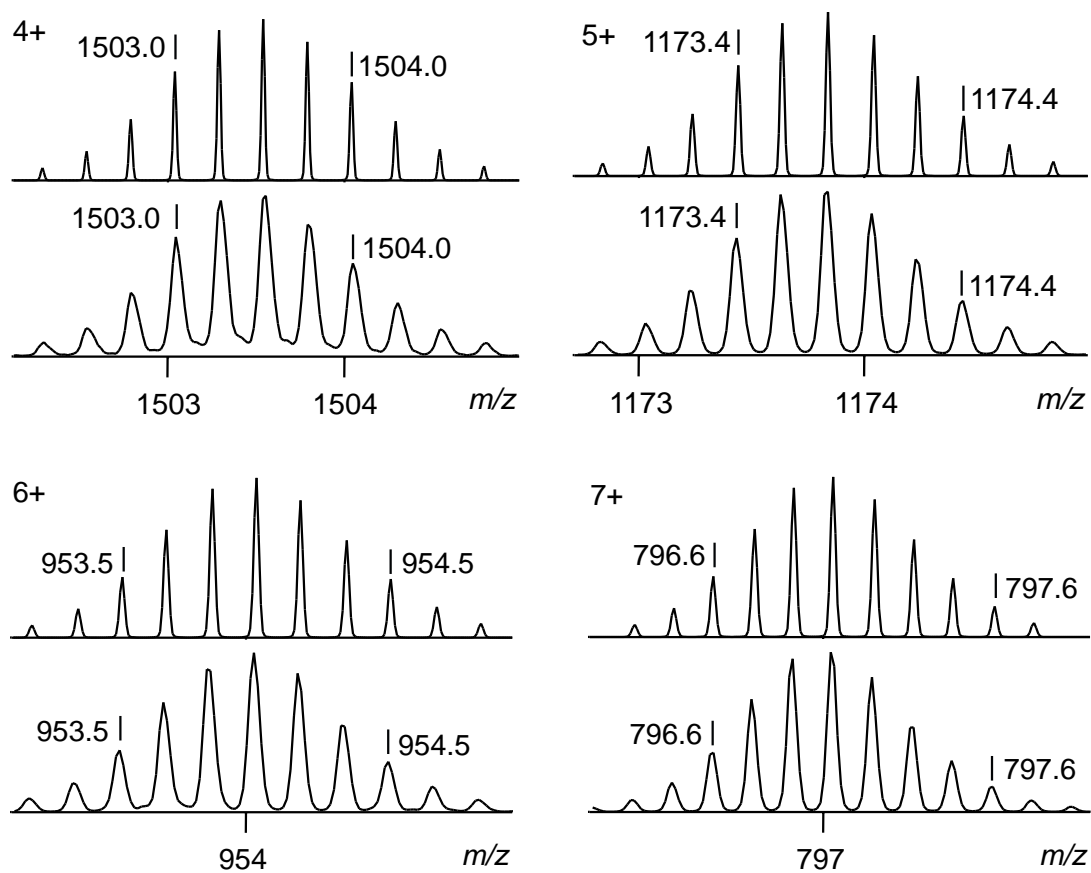

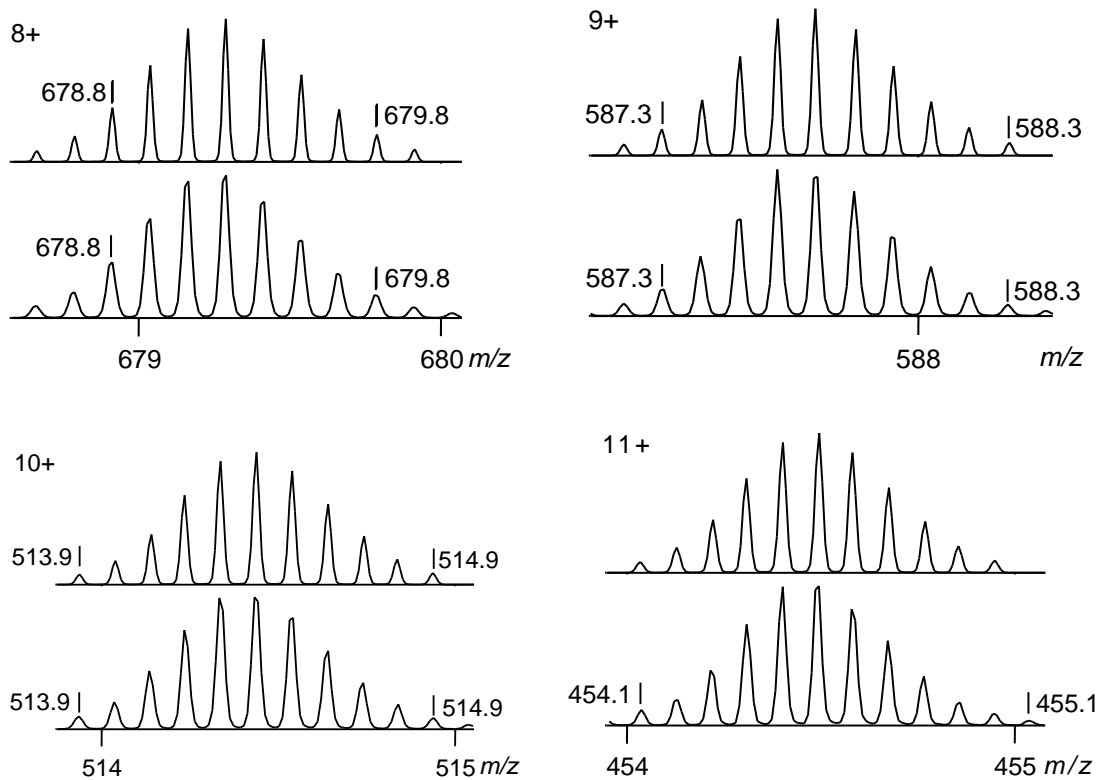

**Supplementary Figure 9:** Measured (bottom) and calculated (top) isotope patterns for different charge states observed from metallo-bowtie  $[\text{Fe}_6\text{V}_4\text{X}]^{12+}$  ( $\text{PF}_6^-$  as counterion).

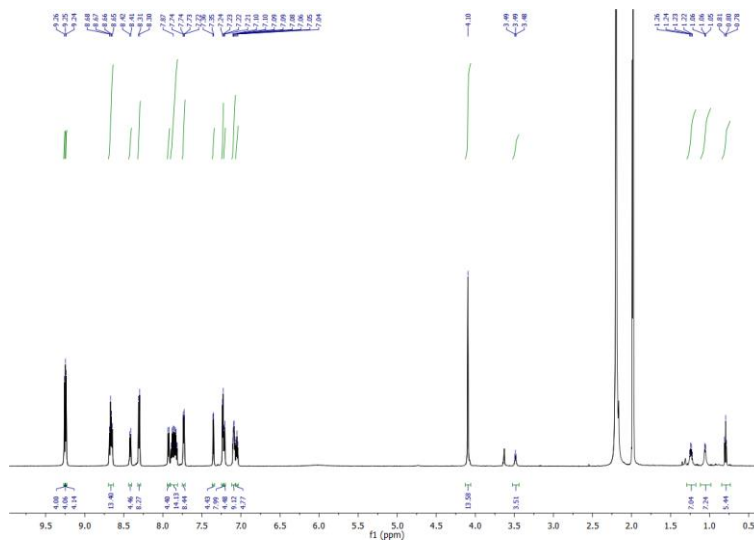

**Supplementary Figure 10.**  $^1\text{H}$  NMR (600 MHz,  $\text{CD}_3\text{CN}$  as solvent) spectrum of metallo-bowtie  $[\text{Fe}_6\text{V}_4\text{X}]^{12+}$ .



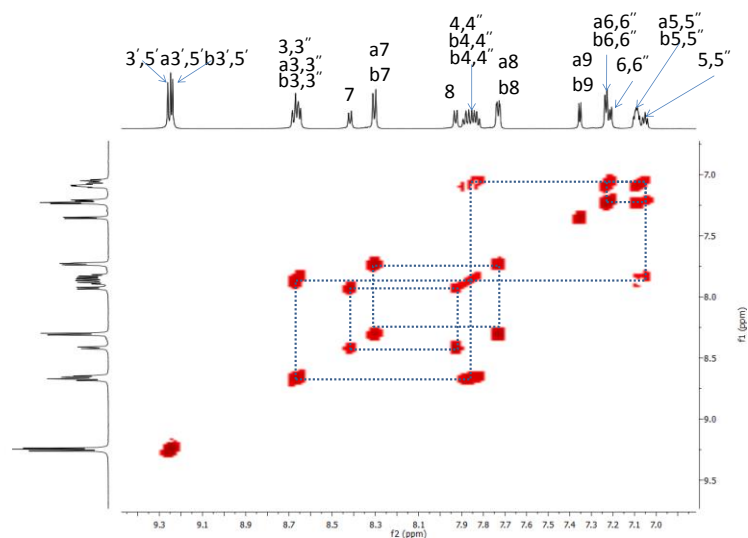

**Supplementary Figure 13.** 2D COSY NMR (600 MHz, CD<sub>3</sub>CN as solvent) spectrum of metallo-bowtie [Fe<sub>6</sub>V<sub>4</sub>X]<sup>12+</sup> (aromatic region).

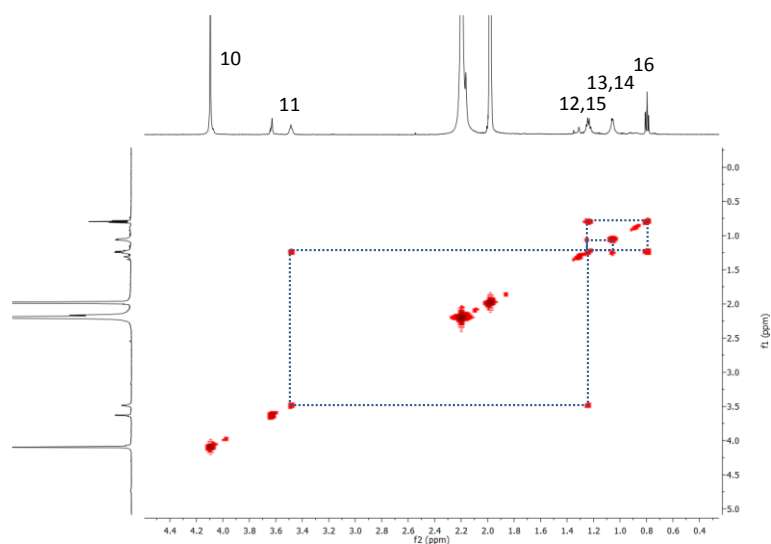

**Supplementary Figure 14.** 2D COSY NMR (600 MHz, CD<sub>3</sub>CN as solvent) spectrum of metallo-bowtie [Fe<sub>6</sub>V<sub>4</sub>X]<sup>12+</sup> (aliphatic region).

### 2.6.3. Tri-metallotriangle [Fe<sub>9</sub>V<sub>5</sub>X<sub>2</sub>]<sup>18+</sup>:

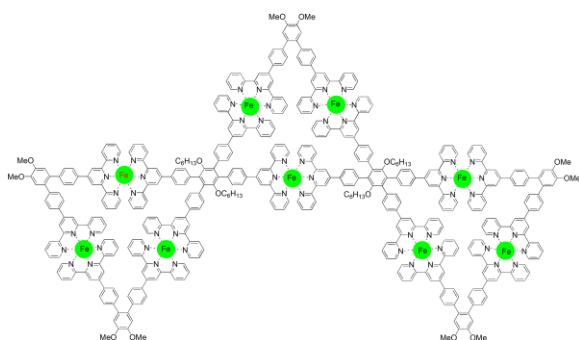

The quantity of this complex is too small to obtain a clear NMR spectra, so only HR-MS has been measured which could confirm the structure. m.p. >320°C; ESI MS (CD<sub>3</sub>CN as solvent, *m/z*): 1503.6 [M-6PF<sub>6</sub><sup>-</sup>]<sup>6+</sup> (calcd *m/z*: 1503.6), 1268.2 [M-7PF<sub>6</sub><sup>-</sup>]<sup>7+</sup> (calcd *m/z*:

1268.2), 1091.6 [M-8PF<sub>6</sub><sup>-</sup>]<sup>8+</sup> (calcd *m/z*: 1091.6), 954.2 [M-9PF<sub>6</sub><sup>-</sup>]<sup>9+</sup> (calcd *m/z*: 954.2), 844.3 [M-10PF<sub>6</sub><sup>-</sup>]<sup>10+</sup> (calcd *m/z*: 844.3), 754.4 [M-11PF<sub>6</sub><sup>-</sup>]<sup>11+</sup> (calcd *m/z*: 754.4), 679.4 [M-12PF<sub>6</sub><sup>-</sup>]<sup>12+</sup> (calcd *m/z*: 679.4), 615.9 [M-13PF<sub>6</sub><sup>-</sup>]<sup>13+</sup> (calcd *m/z*: 615.9) and 561.7 [M-11PF<sub>6</sub><sup>-</sup>]<sup>14+</sup> (calcd *m/z*: 561.7).

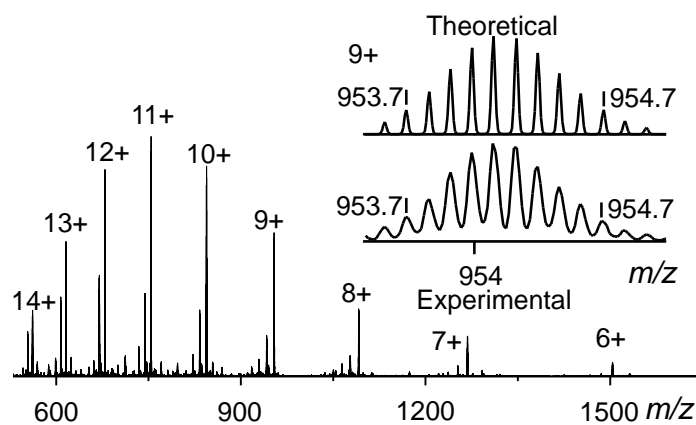

**Supplementary Figure 15.** ESI-MS of Tri-metallotriangle [Fe<sub>9</sub>V<sub>5</sub>X<sub>2</sub>]<sup>18+</sup>. The charge states of intact assemblies are marked.

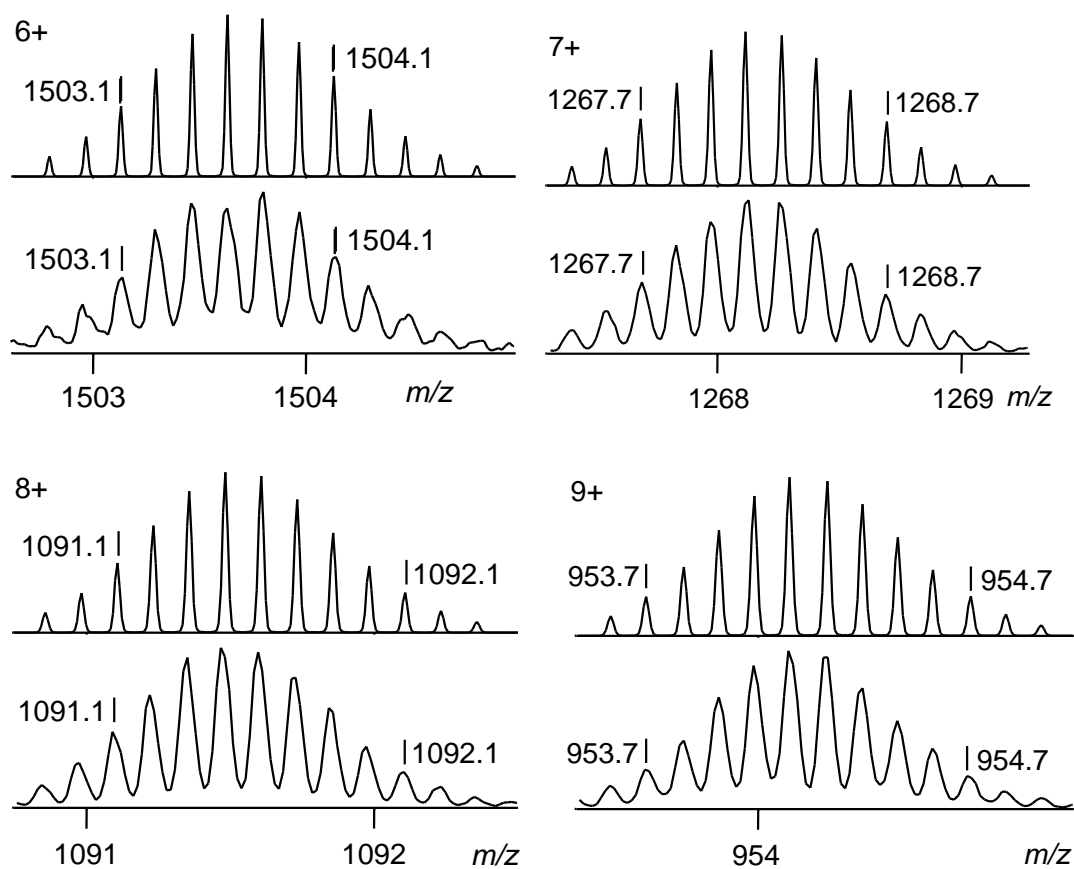



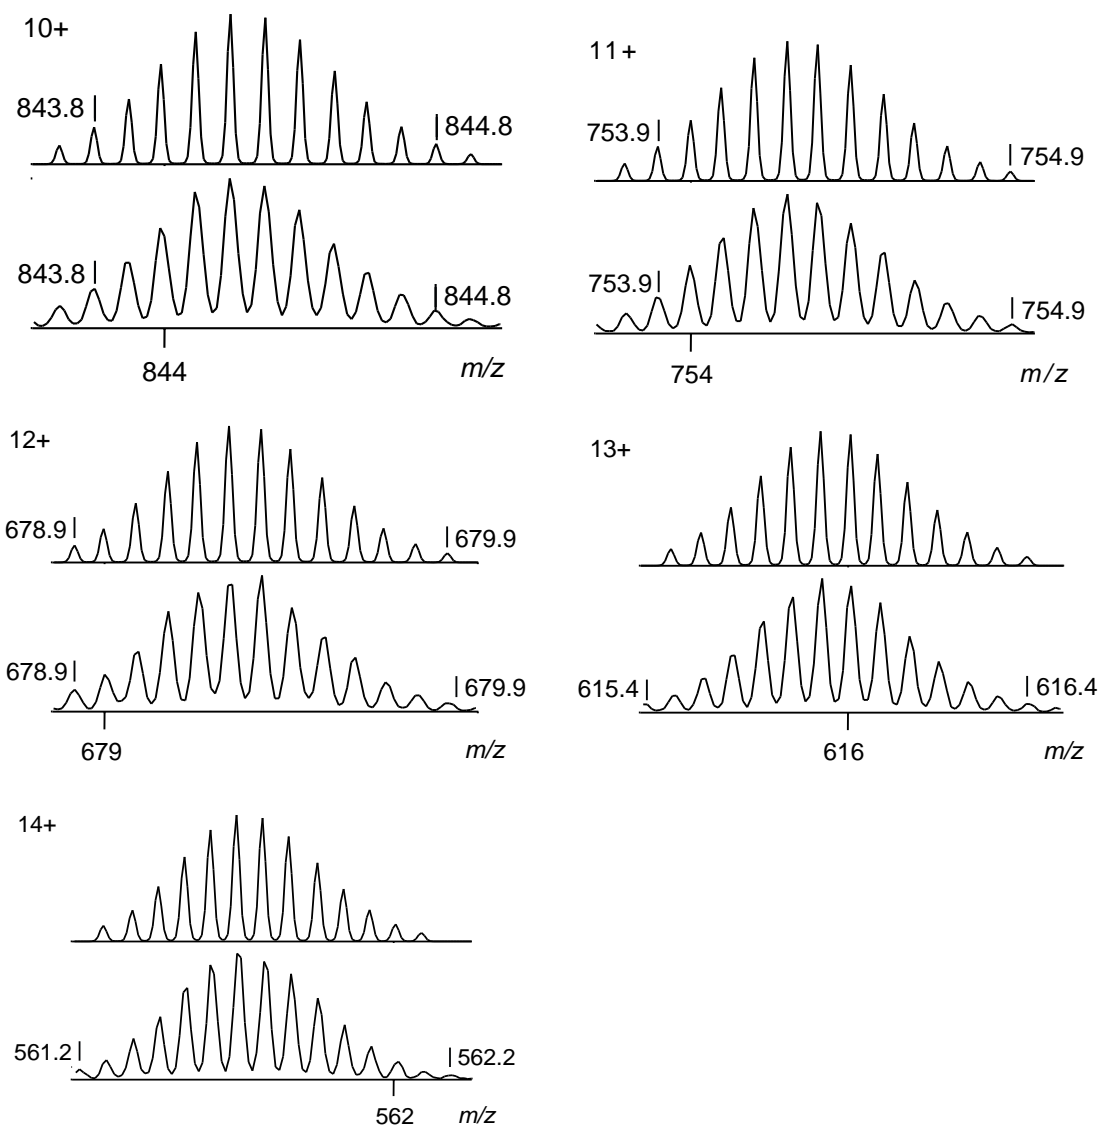

**Supplementary Figure 16.** Measured (bottom) and calculated (top) isotope patterns for different charge states observed from Tri-metallotriangle  $[\text{Fe}_9\text{V}_5\text{X}_2]^{18+}$  ( $\text{PF}_6^-$  as counterion).

## 2.7. supramolecular pentagram $[Cd_{10}LA_5]^{30+}$ :

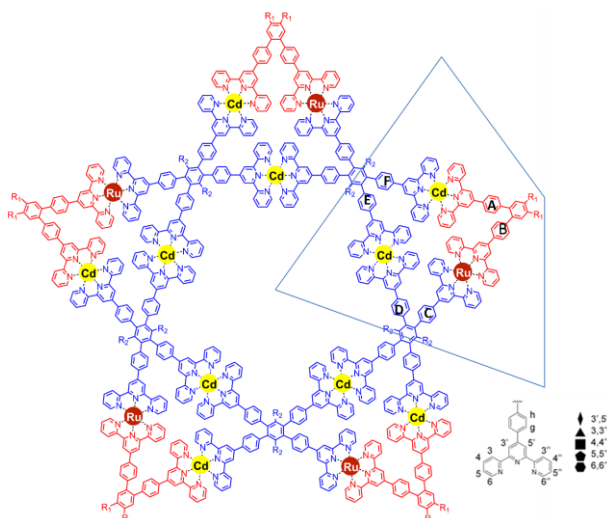

To a solution of ligand **LA** (4.86 mg, 2  $\mu$ mol) in  $CHCl_3/MeOH$  (10 mL, 1:1 v/v), a solution of  $Cd(NO_3)_2 \cdot 6H_2O$  (1.232 mg, 4  $\mu$ mol) in MeOH (5 mL) was added in drop; then the mixture was stirred at ambient for 8 hours.  $NH_4PF_6$  was added to generate an orange precipitate, which was washed with water and MeOH to obtain a pale reddish product (6.57 mg,

95%).  $^1H$  NMR (400 MHz,  $CD_3CN$ )  $\delta$  9.06 (m,  $tpy^B H^{3',5'}$ ,  $tpy^C H^{3',5'}$ , 20H), 8.99(m,  $tpy^A H^{3',5'}$ ,  $tpy^D H^{3',5'}$ ,  $tpy^E H^{3',5'}$ ,  $tpy^F H^{3',5'}$ , 40H) 8.80 (m,  $tpy^A H^{3,3''}$ ,  $tpy^D H^{3,3''}$ ,  $tpy^E H^{3,3''}$ ,  $tpy^F H^{3,3''}$  40H), 8.69m, ( $tpy^B H^{3,3''}$ ,  $tpy^C H^{3,3''}$ , 20H), 8.16 (m,  $tpy^A H^g$ ,  $tpy^B H^g$ ,  $tpy^C H^g$ ,  $tpy^D H^g$ ,  $tpy^E H^g$ ,  $tpy^F H^g$ ,  $tpy^A H^{4,4''}$ ,  $tpy^D H^{4,4''}$ ,  $tpy^E H^{4,4''}$ ,  $tpy^F H^{4,4''}$ , 100H), 7.87 (m,  $tpy^B H^{4,4''}$ ,  $tpy^C H^{4,4''}$  20H), 7.79 (m,  $tpy^C H^h$ ,  $tpy^D H^h$ ,  $tpy^E H^h$ ,  $tpy^F H^h$ , 40H), 7.64(m,  $tpy^A H^h$ ,  $tpy^B H^h$ ,  $tpy^B H^{5,5''}$ ,  $tpy^C H^{5,5''}$  40H), 7.48 (m,  $tpy^A H^{5,5''}$ ,  $tpy^D H^{5,5''}$ ,  $tpy^E H^{5,5''}$ ,  $tpy^F H^{5,5''}$ ,  $tpy^A H^{6,6''}$ ,  $tpy^D H^{6,6''}$ , 60H), 7.30(S,  $ph^m$ , 5H), 7.20 (m,  $ph^n$  5H), 7.15-7.18(m,  $tpy^B H^{6,6''}$ ,  $tpy^C H^{6,6''}$ ,  $tpy^E H^{6,6''}$ ,  $tpy^F H^{6,6''}$ , 40H ) 4.05(m,  $H^{OMe}$ , 30H), 3.36-3.20(m,  $H^{OCH_2R}$ , 20H), 0.89 (m, J = 6.8 Hz, 88H), 0.63 (m, 26H). ESI-MS ( $CD_3CN$  as solvent, m/z): 1583.1  $[M-10PF_6]^{10+}$  (calcd m/z:1583.1), 1426.0 $[M-11PF_6]^{11+}$  (calcd m/z:1426.0), 1295.1 $[M-12PF_6]^{12+}$ (calcd m/z:1295.1), 1184.40  $[M-13PF_6]^{13+}$ (calcd m/z: 1184.40), 1089.4. $[M-14PF_6]^{14+}$ (calcd m/z:1089.4), 1007.19  $[M-15PF_6]^{15+}$ (calcd m/z: 1007.19), 935.25 $[M-16PF_6]^{16+}$ (calcd m/z: 935.25), 871.60  $[M-17PF_6]^{17+}$  (calcd m/z: 871.60), 815.1 $[M-18PF_6]^{18+}$  (calcd m/z: 815.1), 764.45  $[M-19PF_6]^{19+}$  (calcd m/z: 764.5), 719.0  $[M-20PF_6]^{20+}$  (calcd m/z: 719.0), 677.9  $[M-21PF_6]^{21+}$  (calcd m/z: 677.9).

## 2.8. supramolecular pentagram $[\text{Fe}_{10}(\text{LA})_5]^{30+}$

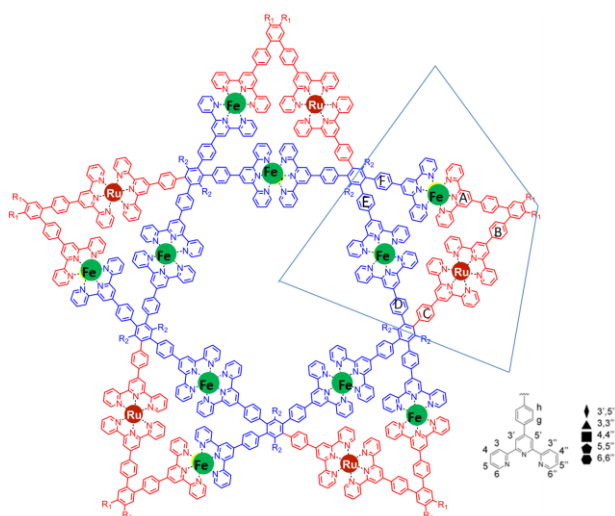

To a solution of ligand **LA** (4.86 mg, 2  $\mu\text{mol}$ ) and  $\text{FeCl}_2 \cdot 4\text{H}_2\text{O}$  (0.796 mg, 4  $\mu\text{mol}$ ) in glycol (10 mL), the mixture was heated to  $145^\circ\text{C}$  for 12 hours. After cooling to ambient, 50 mL MeOH was added to the solution and stirred for 2 hours. Then excess  $\text{NH}_4\text{PF}_6$  was added to cause a purple precipitate, after washed with water and MeOH and dried in

vacuum, a reddish solid was collected (6.38 mg, 95%).  $^1\text{H}$  NMR (500 MHz,  $\text{CD}_3\text{CN}$ )  $\delta$  9.30-9.09 (m,  $\text{tpy}^{\text{A}}\text{H}^{3',5'}$ ,  $\text{tpy}^{\text{B}}\text{H}^{3',5'}$ ,  $\text{tpy}^{\text{C}}\text{H}^{3',5'}$ ,  $\text{tpy}^{\text{D}}\text{H}^{3',5'}$ ,  $\text{tpy}^{\text{E}}\text{H}^{3',5'}$ ,  $\text{tpy}^{\text{F}}\text{H}^{3',5'}$ , 60H), 8.78 – 8.58 (m,  $\text{tpy}^{\text{A}}\text{H}^{3,3'}$ ,  $\text{tpy}^{\text{B}}\text{H}^{3,3'}$ ,  $\text{tpy}^{\text{C}}\text{H}^{3,3'}$ ,  $\text{tpy}^{\text{D}}\text{H}^{3,3'}$ ,  $\text{tpy}^{\text{E}}\text{H}^{3,3'}$ ,  $\text{tpy}^{\text{F}}\text{H}^{3,3'}$ , 60H), 8.25 (m,  $\text{tpy}^{\text{A}}\text{H}^{\text{g}}$ ,  $\text{tpy}^{\text{B}}\text{H}^{\text{g}}$ ,  $\text{tpy}^{\text{C}}\text{H}^{\text{g}}$ ,  $\text{tpy}^{\text{D}}\text{H}^{\text{g}}$ ,  $\text{tpy}^{\text{E}}\text{H}^{\text{g}}$ ,  $\text{tpy}^{\text{F}}\text{H}^{\text{g}}$ , 72H), 8.05 – 7.75 (m,  $\text{tpy}^{\text{A}}\text{H}^{\text{h}}$ ,  $\text{tpy}^{\text{B}}\text{H}^{\text{h}}$ ,  $\text{tpy}^{\text{C}}\text{H}^{\text{h}}$ ,  $\text{tpy}^{\text{D}}\text{H}^{\text{h}}$ ,  $\text{tpy}^{\text{E}}\text{H}^{\text{h}}$ ,  $\text{tpy}^{\text{F}}\text{H}^{\text{h}}$ , 72H), 7.67 (m,  $\text{tpy}^{\text{A}}\text{H}^{4,4'}$ ,  $\text{tpy}^{\text{D}}\text{H}^{4,4'}$ ,  $\text{tpy}^{\text{E}}\text{H}^{4,4'}$ ,  $\text{tpy}^{\text{F}}\text{H}^{4,4'}$ , 48H), 7.50 – 7.36 (m,  $\text{tpy}^{\text{B}}\text{H}^{4,4'}$ ,  $\text{tpy}^{\text{C}}\text{H}^{4,4'}$ , 24H), 7.31 (m,  $\text{tpy}^{\text{B}}\text{H}^{5,5'}$ ,  $\text{tpy}^{\text{C}}\text{H}^{5,5'}$ , 20H), 7.26 – 6.92 (m,  $\text{ph}^{\text{m}}$ ,  $\text{ph}^{\text{n}}$ ,  $\text{tpy}^{\text{A}}\text{H}^{6,6'}$ ,  $\text{tpy}^{\text{B}}\text{H}^{6,6'}$ ,  $\text{tpy}^{\text{C}}\text{H}^{6,6'}$ ,  $\text{tpy}^{\text{D}}\text{H}^{6,6'}$ ,  $\text{tpy}^{\text{E}}\text{H}^{6,6'}$ ,  $\text{tpy}^{\text{F}}\text{H}^{6,6'}$ ,  $\text{tpy}^{\text{A}}\text{H}^{5,5'}$ ,  $\text{tpy}^{\text{D}}\text{H}^{5,5'}$ ,  $\text{tpy}^{\text{E}}\text{H}^{5,5'}$ ,  $\text{tpy}^{\text{F}}\text{H}^{5,5'}$ , 70H), 4.06 (s,  $\text{H}^{\text{OMe}}$ , 32H), 3.57 (s,  $\text{H}^{\text{OCH}_2\text{R}}$ , 25H). ESI-MS ( $\text{CD}_3\text{CN}$  as solvent,  $m/z$ ): 1712.4  $[\text{M}-9\text{PF}_6]^{9+}$  (calcd  $m/z$ : 1712.4), 1526.6  $[\text{M}-10\text{PF}_6]^{10+}$  (calcd  $m/z$ : 1526.6), 1374.4  $[\text{M}-11\text{PF}_6]^{11+}$  (calcd  $m/z$ : 1374.4), 1248.0  $[\text{M}-12\text{PF}_6]^{12+}$  (calcd  $m/z$ : 1248.0), 1140.8  $[\text{M}-13\text{PF}_6]^{13+}$  (calcd  $m/z$ : 1140.8), 1049.1  $[\text{M}-14\text{PF}_6]^{14+}$  (calcd  $m/z$ : 1049.1), 969.5  $[\text{M}-15\text{PF}_6]^{15+}$  (calcd  $m/z$ : 969.5), 899.9  $[\text{M}-16\text{PF}_6]^{16+}$  (calcd  $m/z$ : 899.9), 838.4  $[\text{M}-17\text{PF}_6]^{17+}$  (calcd  $m/z$ : 838.4), 784.0  $[\text{M}-18\text{PF}_6]^{18+}$  (calcd  $m/z$ : 784.0), 734.8  $[\text{M}-19\text{PF}_6]^{19+}$  (calcd  $m/z$ : 734.8), 690.8  $[\text{M}-20\text{PF}_6]^{20+}$  (calcd  $m/z$ : 690.8), 651.0  $[\text{M}-21\text{PF}_6]^{21+}$  (calcd  $m/z$ : 651.0), 614.8  $[\text{M}-22\text{PF}_6]^{22+}$  (calcd  $m/z$ : 614.8).

## 2.9. supramolecular hexagram $[\text{Cd}_{12}\text{V}_3(\text{LB})_3]^{36+}$

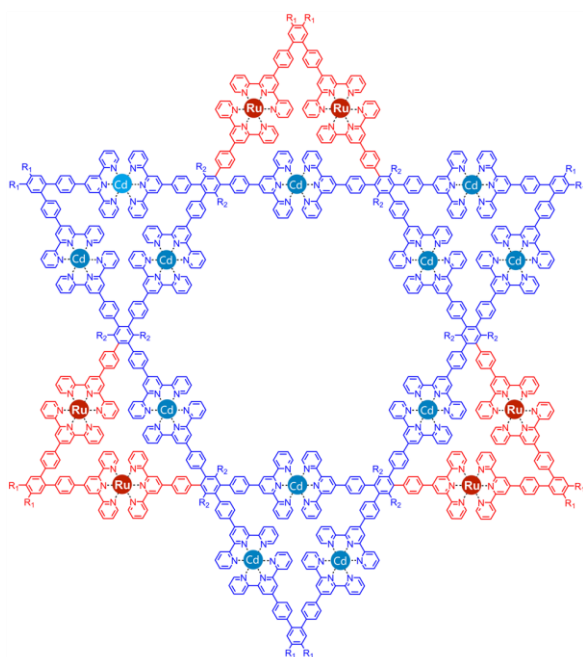

To a solution of ligand **LB** (8.90 mg, 2  $\mu\text{mol}$ ) and **V** (1.51 mg, 2  $\mu\text{mol}$ ) in  $\text{CHCl}_3/\text{MeOH}$  (10 mL, 1:1 v/v), a methanolic solution of  $\text{Cd}(\text{NO}_3)_2 \cdot 6\text{H}_2\text{O}$  (2.464 mg, 8  $\mu\text{mol}$ ) was added dropwise; then the mixture was stirred at ambient for 8 hours. Excess amount of  $\text{NH}_4\text{PF}_6$  was added to generate a pale reddish precipitate, after washing water and MeOH and dried under vacuum to obtain reddish solid 14 mg. NMR and Mass spectra indicated there are two compounds

(see Figure S50 and S51), including a metallo-triangle and a target Star-Of-David, which could not be separated by a conventional column chromatography due to the weak coordination of  $\langle \text{tpy}-\text{Cd}^{2+}-\text{tpy} \rangle$ . The ESI-MS of Star-Of-David are list as following: ESI-MS( $\text{CD}_3\text{CN}$  as solvent,  $m/z$ ): 1832.1  $[\text{M}-11\text{PF}_6^-]^{11+}$  (calcd  $m/z$ : 1832.1), 1667.9  $[\text{M}-12\text{PF}_6^-]^{12+}$  (calcd  $m/z$ : 1667.9), 1528.3  $[\text{M}-13\text{PF}_6^-]^{13+}$  (calcd  $m/z$ : 1528.3), 1408.6  $[\text{M}-14\text{PF}_6^-]^{14+}$  (calcd  $m/z$ : 1408.6), 1305.1  $[\text{M}-15\text{PF}_6^-]^{15+}$  (calcd  $m/z$ : 1305.1), 1214.4  $[\text{M}-16\text{PF}_6^-]^{16+}$  (calcd  $m/z$ : 1214.4), 1134.5  $[\text{M}-17\text{PF}_6^-]^{17+}$  (calcd  $m/z$ : 1134.5), 1061.4  $[\text{M}-18\text{PF}_6^-]^{18+}$  (calcd  $m/z$ : 1061.4), 999.7  $[\text{M}-19\text{PF}_6^-]^{19+}$  (calcd  $m/z$ : 999.7) and 942.4  $[\text{M}-19\text{PF}_6^-]^{20+}$  (calcd  $m/z$ : 942.4).

## 2.10. supramolecular hexagram $[\text{Fe}_{12}\text{V}_3(\text{LB})_3]^{36+}$

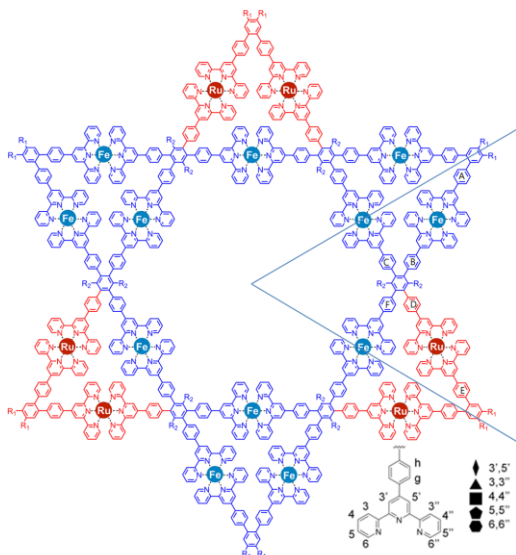

To a solution of ligand **LB** (8.90 mg, 2  $\mu\text{mol}$ ) and **V** (1.51 mg, 2  $\mu\text{mol}$ ) in glycol (10 mL, 1:1 v/v), a solution of  $\text{FeCl}_2 \cdot 4\text{H}_2\text{O}$  (1.584 mg, 8  $\mu\text{mol}$ ) in glycol (5 mL) was added dropwise. The mixture was heated to  $145^\circ\text{C}$  for 12 hours. After cooling down to ambient, 50 mL MeOH was added and stirred for another 2 hours, adding excess amount of  $\text{NH}_4\text{PF}_6$  to produce a purple reddish precipitate.

A short column chromatography was used for isolated the trace amount of triangle byproduct ( $\text{Fe}_3\text{V}_3$ )<sup>6+</sup>. The isolated Star of David was washed with water and MeOH to generate a reddish product 13.20 mg (92%). <sup>1</sup>H NMR (500 MHz, CD<sub>3</sub>CN)  $\delta$  9.2-9.4 (m, 48H, tpy<sup>A</sup>H<sup>3',5'</sup>, tpy<sup>B</sup>H<sup>3',5'</sup>, tpy<sup>C</sup>H<sup>3',5'</sup>, tpy<sup>D</sup>H<sup>3',5'</sup>), 9.05-9.15 (m, tpy<sup>D</sup>H<sup>3',5'</sup>, tpy<sup>E</sup>H<sup>3',5'</sup>, 24H), 8.68-8.80 (m, 72H, tpy<sup>A</sup>H<sup>3,3''</sup>, tpy<sup>B</sup>H<sup>3,3''</sup>, tpy<sup>C</sup>H<sup>3,3''</sup>, tpy<sup>D</sup>H<sup>3,3''</sup>, tpy<sup>E</sup>H<sup>3,3''</sup>, tpy<sup>F</sup>H<sup>3,3''</sup>), 8.15-8.45 (m, tpy<sup>A</sup>H<sup>g</sup>, tpy<sup>B</sup>H<sup>g</sup>, tpy<sup>C</sup>H<sup>g</sup>, tpy<sup>D</sup>H<sup>g</sup>, tpy<sup>E</sup>H<sup>g</sup>, 72H), 7.85-8.05 (m, tpy<sup>A</sup>H<sup>h</sup>, tpy<sup>B</sup>H<sup>g</sup>, tpy<sup>C</sup>H<sup>h</sup>, tpy<sup>C</sup>H<sup>h</sup>, tpy<sup>D</sup>H<sup>h</sup>, tpy<sup>E</sup>H<sup>h</sup>, tpy<sup>F</sup>H<sup>h</sup>, tpy<sup>D</sup>H<sup>4,4''</sup>, tpy<sup>E</sup>H<sup>4,4''</sup>, 96H), 7.60-7.70 (m, tpy<sup>A</sup>H<sup>4,4''</sup>, tpy<sup>B</sup>H<sup>4,4''</sup>, tpy<sup>C</sup>H<sup>4,4''</sup>, tpy<sup>F</sup>H<sup>4,4''</sup>, 48H), 7.32-7.55(m, tpy<sup>A</sup>H<sup>5,5''</sup>, tpy<sup>B</sup>H<sup>5,5''</sup>, tpy<sup>C</sup>H<sup>5,5''</sup>, tpy<sup>D</sup>H<sup>5,5''</sup>, tpy<sup>E</sup>H<sup>5,5''</sup>, tpy<sup>F</sup>H<sup>5,5''</sup> 72H), 7.05-7.19 (m, 84H), 7.05 (m, ph<sup>m</sup>, ph<sup>n</sup>, tpy<sup>A</sup>H<sup>6,6''</sup>, tpy<sup>B</sup>H<sup>6,6''</sup>, tpy<sup>C</sup>H<sup>6,6''</sup>, tpy<sup>D</sup>H<sup>6,6''</sup>, tpy<sup>E</sup>H<sup>6,6''</sup>, tpy<sup>F</sup>H<sup>6,6''</sup>, tpy<sup>A</sup>H<sup>5,5''</sup>, tpy<sup>D</sup>H<sup>5,5''</sup>, tpy<sup>E</sup>H<sup>5,5''</sup>, tpy<sup>F</sup>H<sup>5,5''</sup> 84H), 4.06 (m, 36H, -OMe), 3.44 (m, 24H, -OCH<sub>2</sub>-), 0.92 (m, 78H -Alkyl-H), 0.53-0.68 (m, Alkyl-H, 154H). ESI-MS (CD<sub>3</sub>CN as solvent, m/z): 1771.1[M-11PF<sub>6</sub>]<sup>-</sup>11<sup>+</sup>, (calcd m/z: 1771.1), 1671.4[M-12PF<sub>6</sub>]<sup>-</sup>12<sup>+</sup> (calcd m/z: 1671.4), 1476.2 [M-13PF<sub>6</sub>]<sup>-</sup>13<sup>+</sup> (calcd m/z:1476.2), 1360.2 [M-14PF<sub>6</sub>]<sup>-</sup>14<sup>+</sup> (calcd m/z: 1360.2), 1259.9 [M-15PF<sub>6</sub>]<sup>-</sup>15<sup>+</sup> (calcd m/z: 1259.9), 1171.8 [M-16PF<sub>6</sub>]<sup>-</sup>16<sup>+</sup> (calcd m/z: 1171.8), 1094.70[M-17PF<sub>6</sub>]<sup>-</sup>17<sup>+</sup>, (calcd m/z: 1094.70), 1025.71 [M-18PF<sub>6</sub>]<sup>-</sup>18<sup>+</sup> (calcd m/z:1025.71), 963.41 [M-19PF<sub>6</sub>]<sup>-</sup>19<sup>+</sup> (calcd m/z: 963.98), 908.67 [M-20PF<sub>6</sub>]<sup>-</sup>20<sup>+</sup> (calcd m/z: 908.67), 858.45 [M-21PF<sub>6</sub>]<sup>-</sup>21<sup>+</sup> (calcd m/z: 858.45), 812.7 [M-22PF<sub>6</sub>]<sup>-</sup>22<sup>+</sup> (calcd m/z: 1812.7), 771.3 [M-23PF<sub>6</sub>]<sup>-</sup>23<sup>+</sup> (calcd m/z: 771.3), 733.1 [M-24PF<sub>6</sub>]<sup>-</sup>24<sup>+</sup> (calcd m/z: 733.1).

### 3. HR-MS, NMR and UV-vis spectrum of ligands and complexes

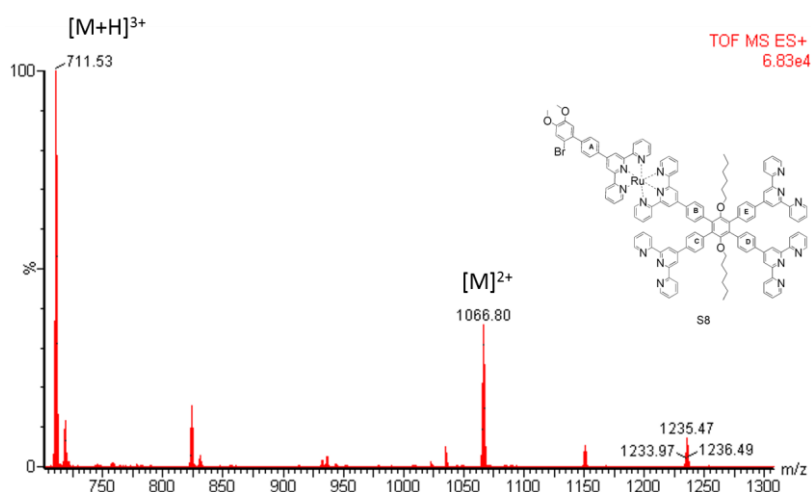

**Supplementary Figure 17:** The HR-MS spectrum of compound *L-Br* in CH<sub>3</sub>CN.





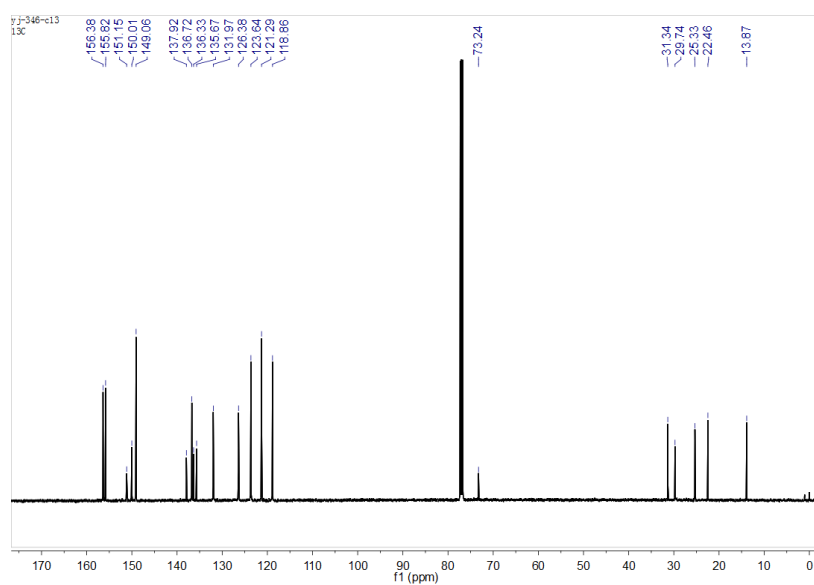

**Supplementary Figure 23:** the  $^{13}\text{C}$  NMR spectrum of *X-C6* (125 MHz,  $\text{CDCl}_3$  as solvent )

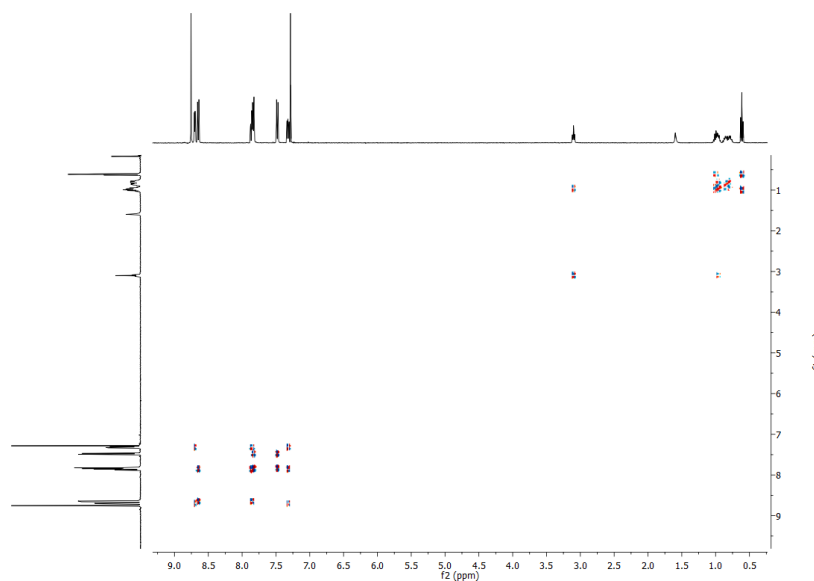

**Supplementary Figure 24:** the 2D COSY spectrum of Ligand *X-C6* (400 MHz,  $\text{CDCl}_3$  as solvent)



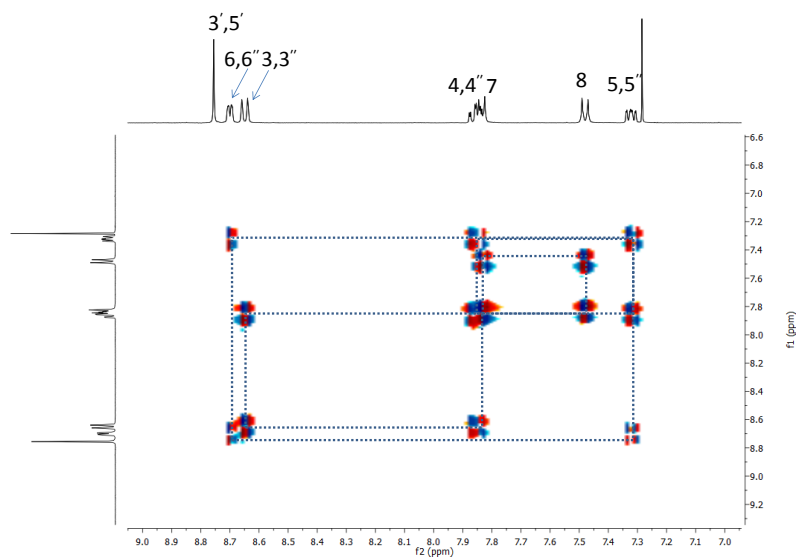

**Supplementary Figure 25:** the COSY spectrum of Ligand **X-C6**. (400 MHz,  $\text{CDCl}_3$  as solvent, aromatic region).

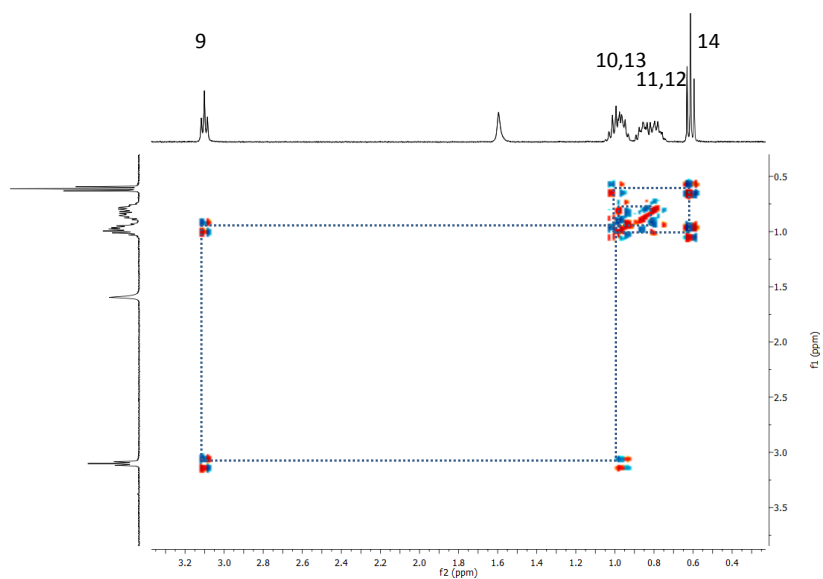

**Supplementary Figure 26:** the 2D COSY spectrum of Ligand **X-C6** (400 MHz.  $\text{CDCl}_3$  as solvent, aliphatic region)

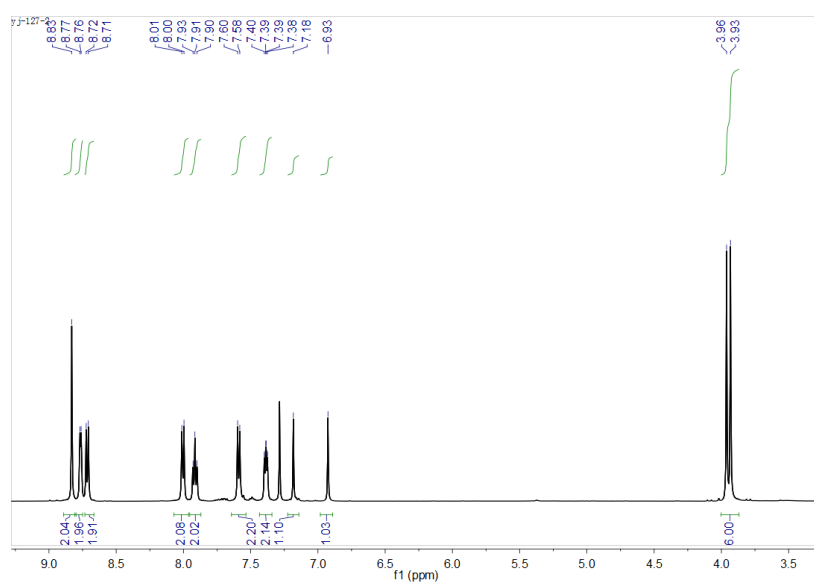

**Supplementary Figure 27:** the  $^1\text{H}$  NMR spectrum of **monobromoterpyridine** (400 MHz,  $\text{CDCl}_3$  as solvent)

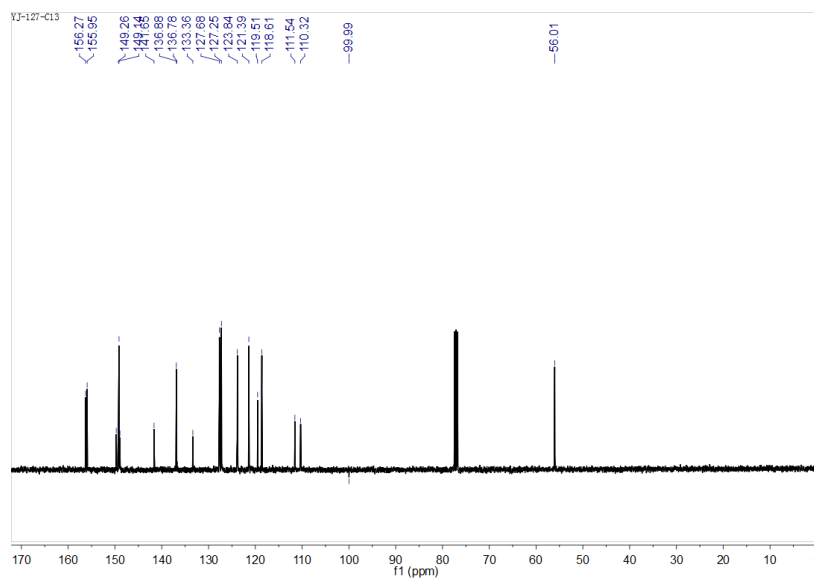

**Supplementary Figure 28:** the  $^{13}\text{C}$  NMR spectrum of **monobromoterpyridine** (125 MHz,  $\text{CDCl}_3$  as solvent).

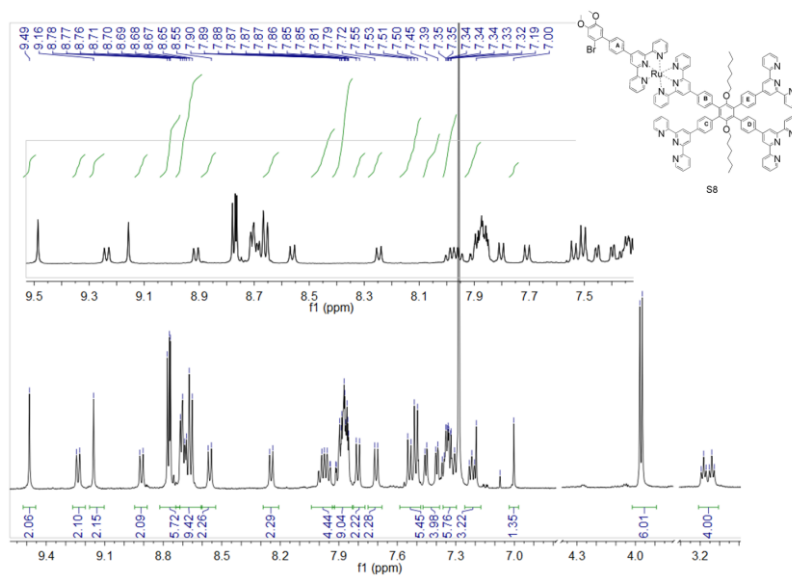

**Supplementary Figure 29:** the  $^1\text{H}$  NMR spectrum of **L-Br**. (aromatic region, 500 MHz,  $\text{CDCl}_3$  as solvent)

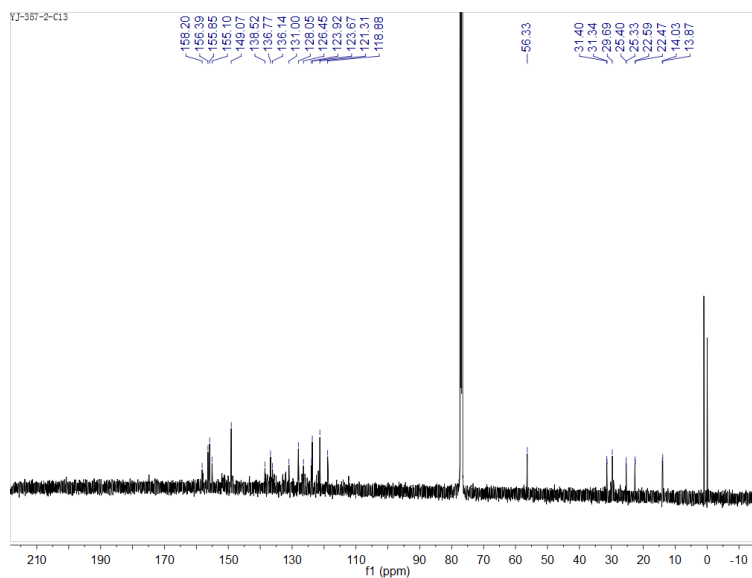

**Supplementary Figure 30:** the  $^{13}\text{C}$  NMR spectrum of **L-Br** (125 MHz,  $\text{CDCl}_3$  as solvent).

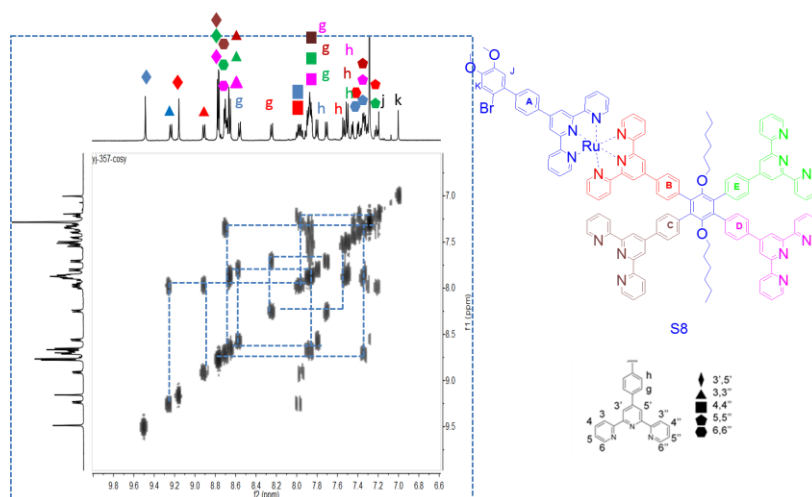

**Supplementary Figure 31:** the COSY spectrum of *L-Br* (aromatic region, 500 MHz, CDCl<sub>3</sub> as solvent)

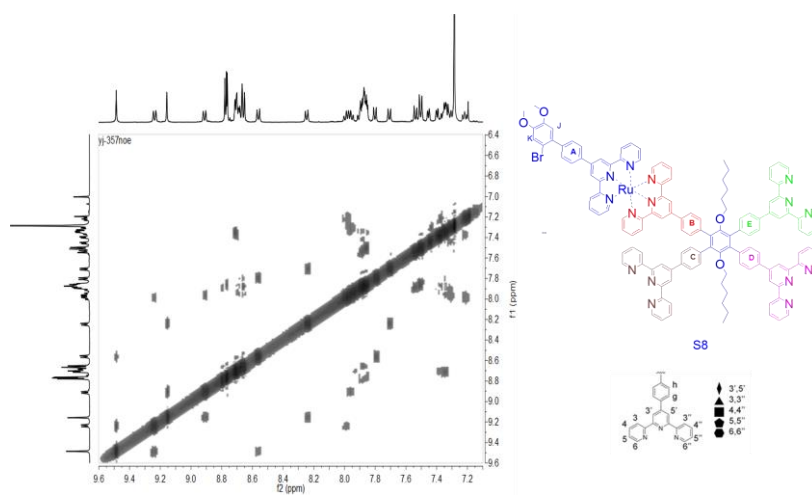

**Supplementary Figure 32:** the NOESY spectrum of *L-Br* (aromatic region, 500 MHz, CDCl<sub>3</sub> as solvent).



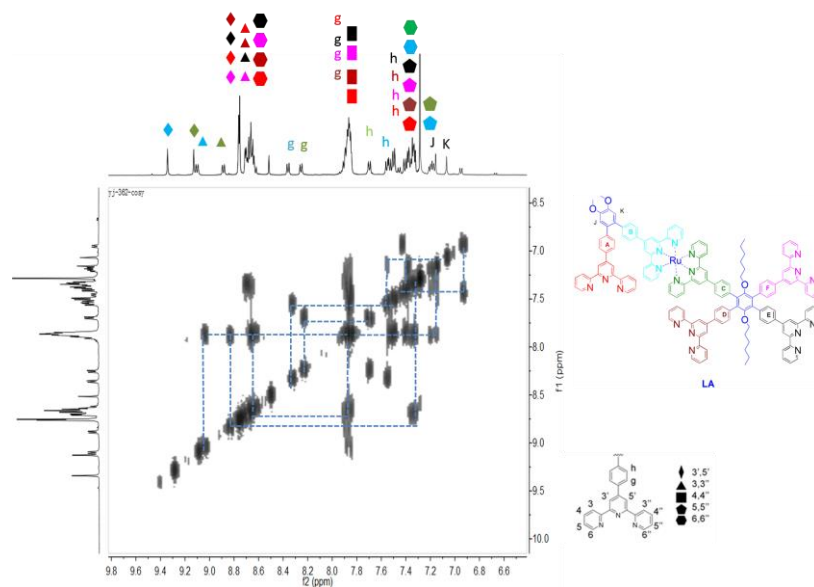

**Supplementary Figure 35:** the COSY spectrum of **LA**. (aromatic region, 500 MHz, CDCl<sub>3</sub> as solvent)

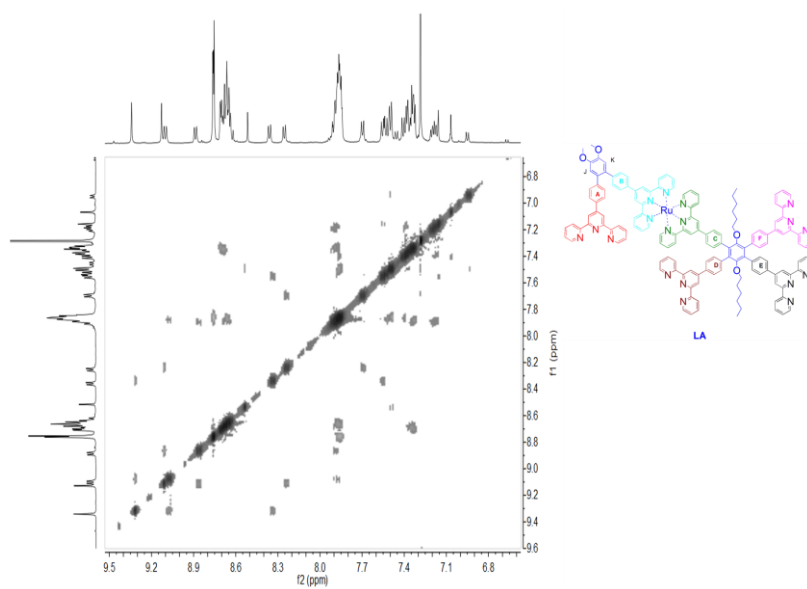

**Supplementary Figure 36:** the NOESY spectrum of **LA** (aromatic region, 500 MHz, CDCl<sub>3</sub> as solvent).

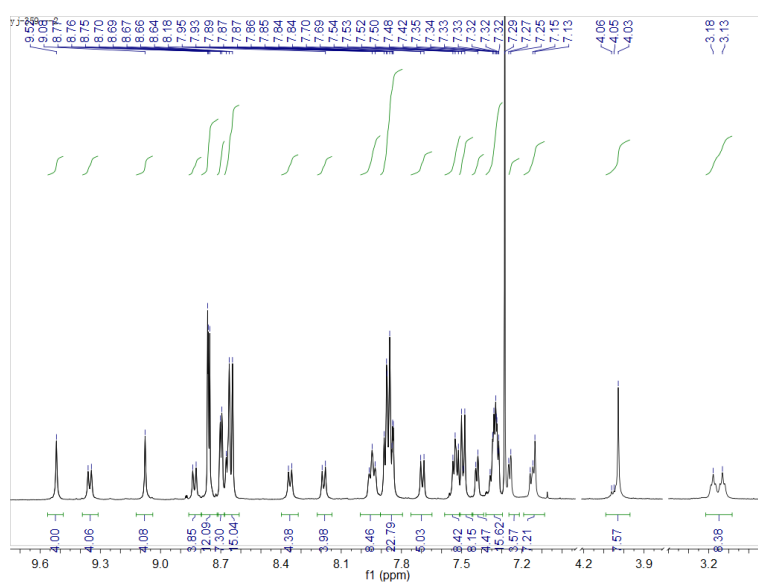

Supplementary Figure 37: the  $^1\text{H}$  NMR spectrum of **LB** (500 MHz,  $\text{CDCl}_3$  as solvent).

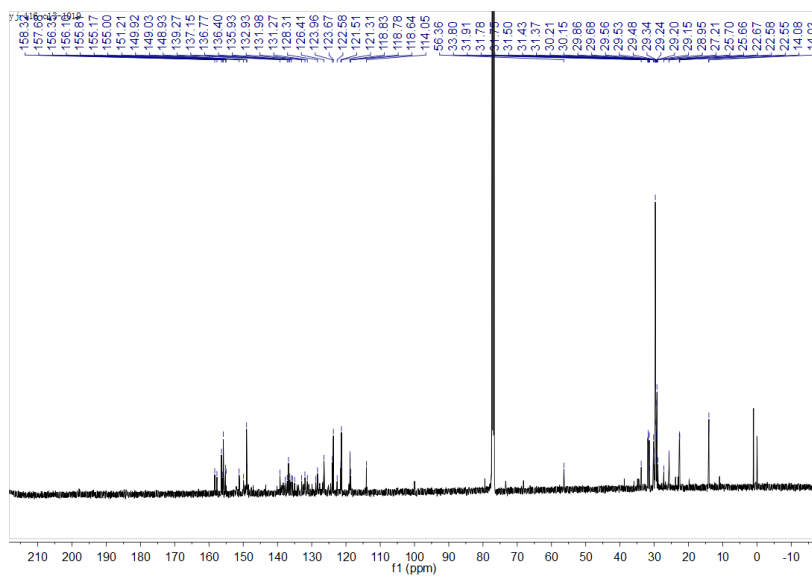

Supplementary Figure 38: the  $^{13}\text{C}$  NMR spectrum of **LB**. (125 MHz,  $\text{CDCl}_3$  as solvent)

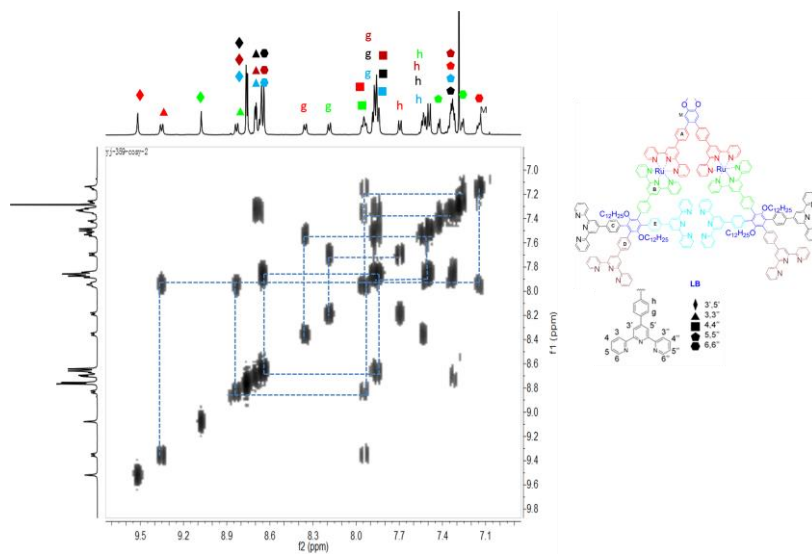

**Supplementary Figure 39:** the COSY spectrum of **LB**. (500 MHz, CDCl<sub>3</sub> as solvent)

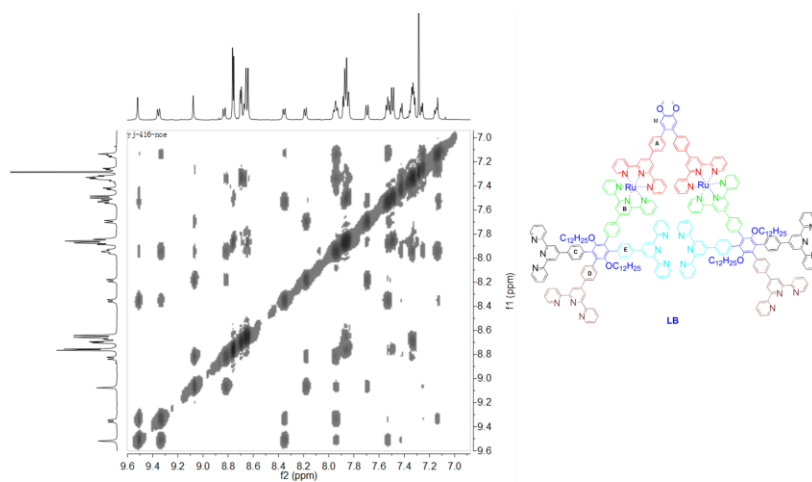

**Supplementary Figure 40:** the NOESY spectrum of **LB**. (aromatic region, 500 MHz, CDCl<sub>3</sub> as solvent)



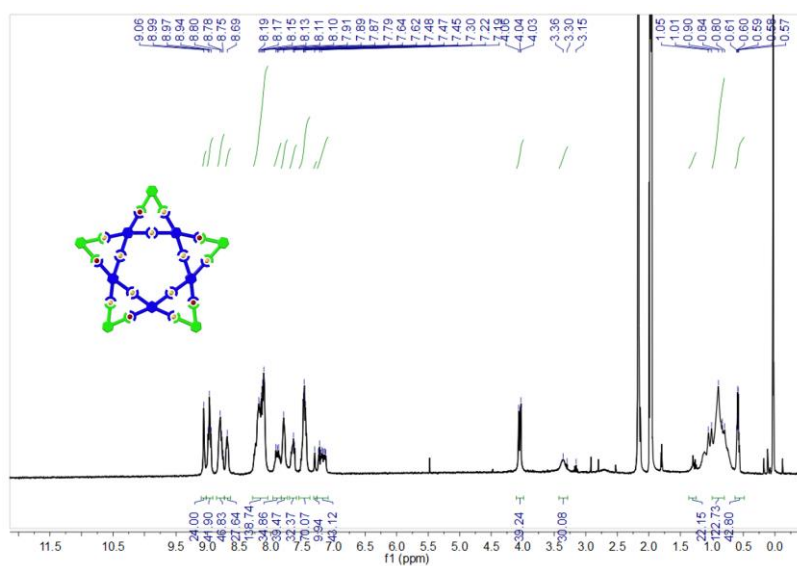

**Supplementary Figure 41:** the  $^1\text{H}$  NMR spectrum of  $[\text{Cd}_{10}\text{LA}_5]^{30+} \cdot 30\text{PF}_6^-$  (500 MHz,  $\text{CD}_3\text{CN}$  as solvent).

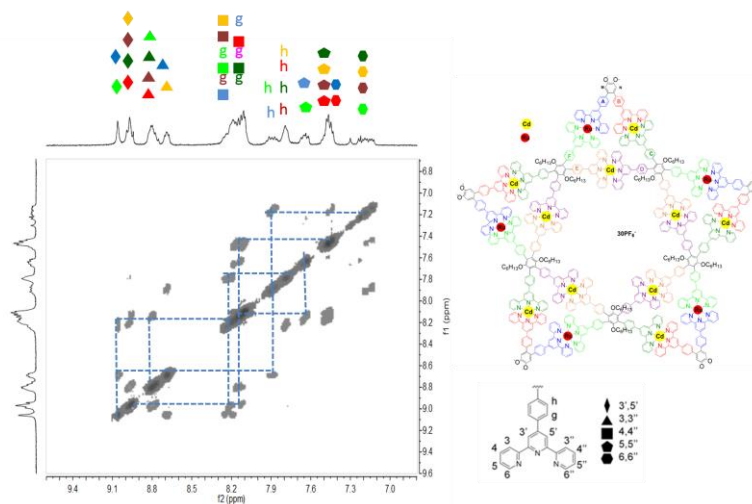

**Supplementary Figure 42:** the NOESY spectrum of  $[\text{Cd}_{10}\text{LA}_5]^{30+} \cdot 30\text{PF}_6^-$  (aromatic region, 500 MHz,  $\text{CD}_3\text{CN}$  as solvent).

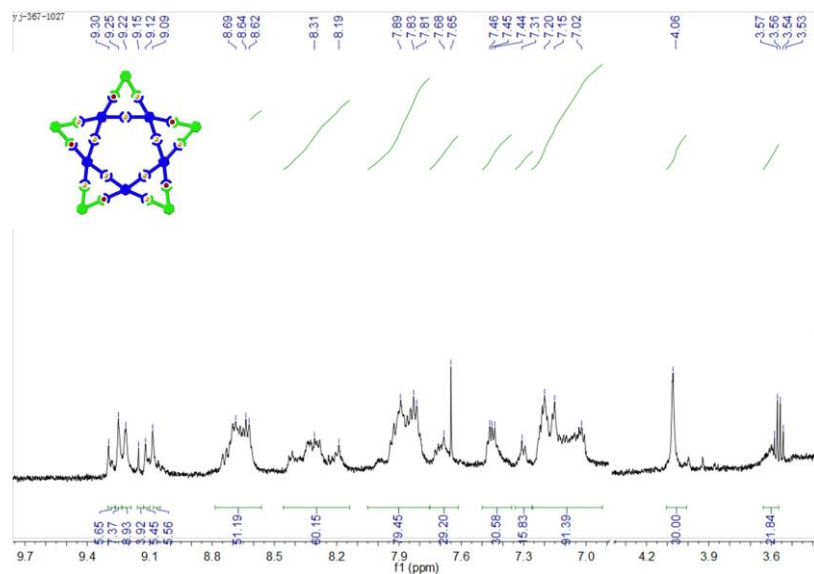

**Supplementary Figure 43:** the  $^1\text{H}$  NMR spectrum of  $[\text{Fe}_{10}\text{LA}_5]^{30+} \cdot 30\text{PF}_6^-$  (500 MHz,  $\text{CD}_3\text{CN}$  as solvent)

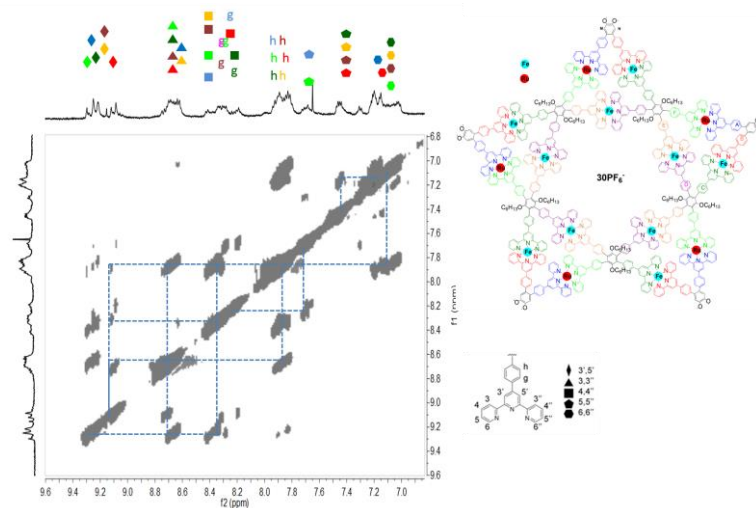

**Supplementary Figure 44:** the NOESY spectrum of  $[\text{Fe}_{10}\text{LA}_5]^{30+} \cdot 30\text{PF}_6^-$  (aromatic region, 500 MHz,  $\text{CD}_3\text{CN}$  as solvent)

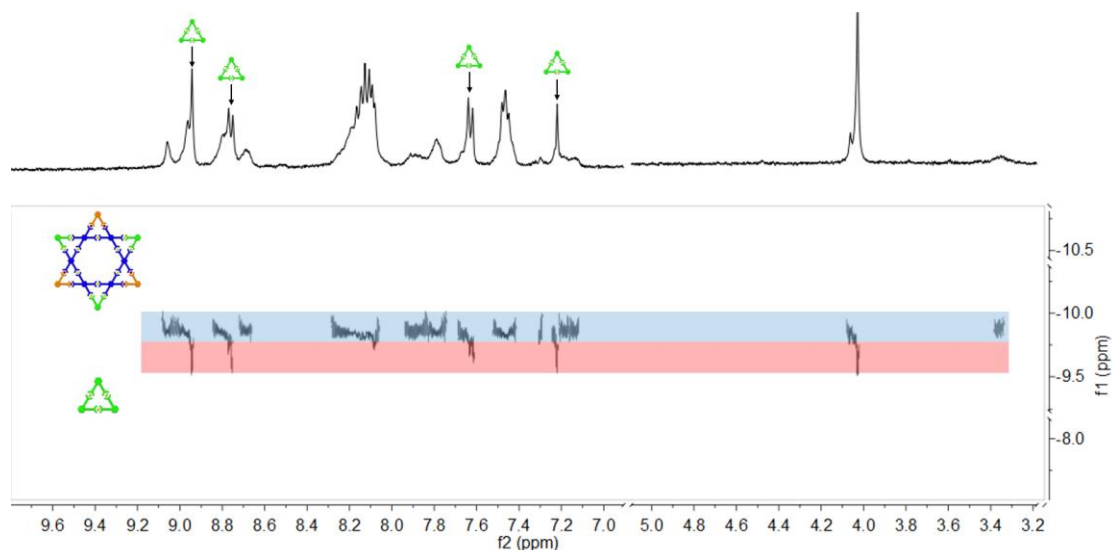

**Supplementary Figure 45:** the <sup>1</sup>H NMR and DOSY spectrum (500 MHz, CD<sub>3</sub>CN as solvent) of [Cd<sub>12</sub>V<sub>3</sub>(LB)<sub>3</sub>]<sup>36+</sup> • 36PF<sub>6</sub><sup>-</sup> and [Cd<sub>3</sub>V<sub>3</sub>]<sup>6+</sup>X • 6PF<sub>6</sub><sup>-</sup> assembled directly with Cd<sup>2+</sup>, V and LB which containing small triangle and Star-Of-David.

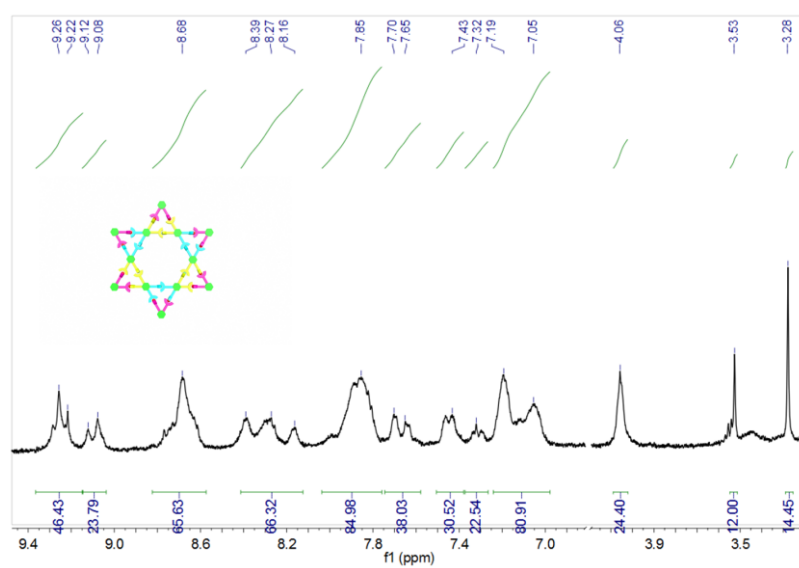

**Supplementary Figure 46:** the <sup>1</sup>H NMR spectrum of [Fe<sub>12</sub>V<sub>3</sub>(LB)<sub>3</sub>]<sup>36+</sup> • 36PF<sub>6</sub><sup>-</sup> (500MHz, CD<sub>3</sub>CN as solvent) assembled with Fe<sup>2+</sup>, V and LB.

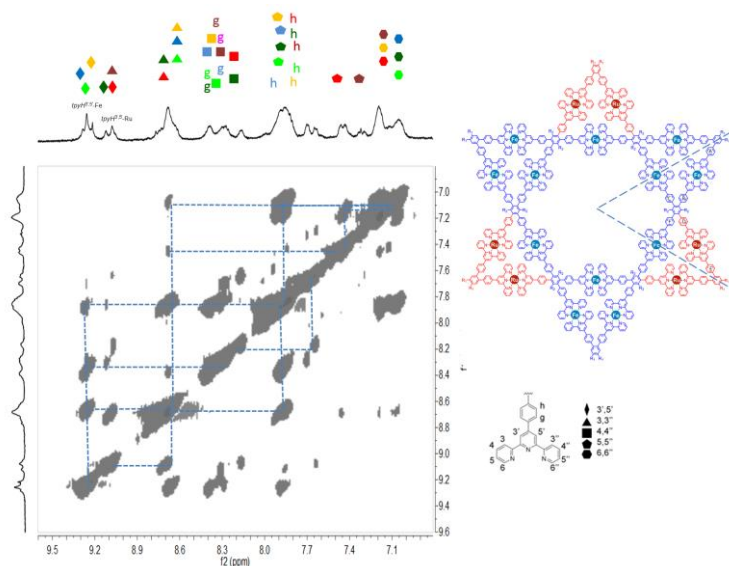

**Supplementary Figure 47:** the NOESY spectrum of  $[Fe_{12}V_3(LB)_3]^{36+} \cdot 36PF_6^-$  (500 MHz,  $CD_3CN$  as solvent).

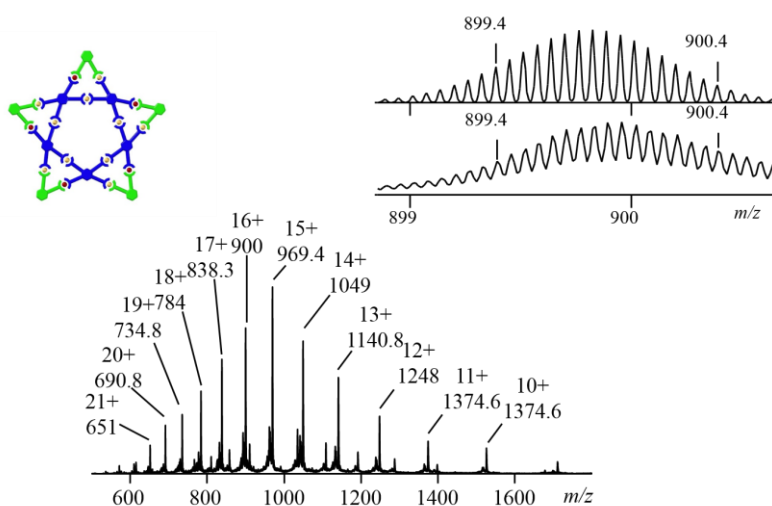

**Supplementary Figure 48:** the MS-Spectrum of  $[Fe_{10}LA_5]^{30+}$  with different charge states from +9 to +23 and measured (bottom) and calculated (top) isotope patterns.

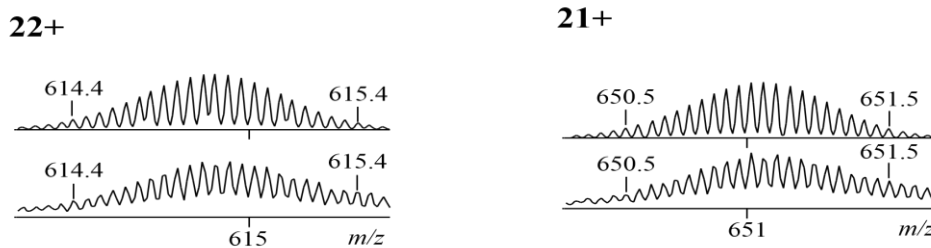

**20+**

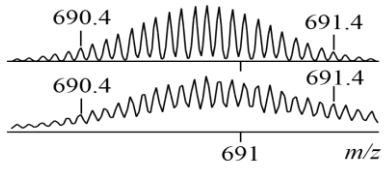

**19+**

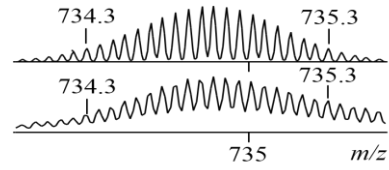

**18+**

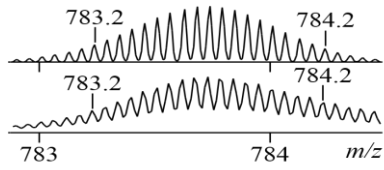

**17+**

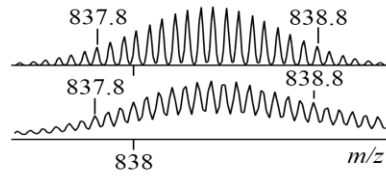

**16+**

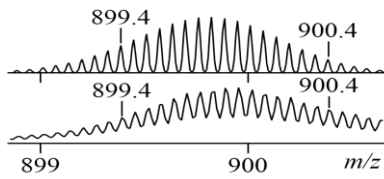

**15+**

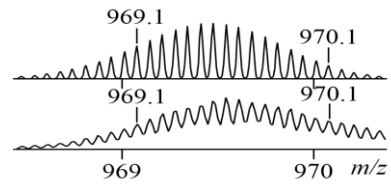

**14+**

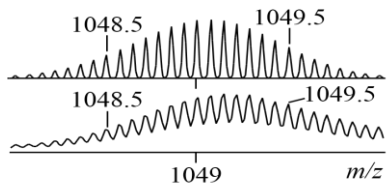

**13+**

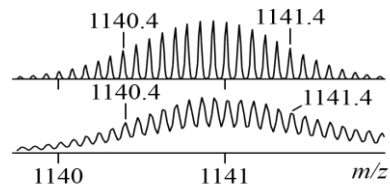

**12+**

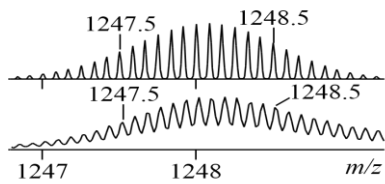

**11+**

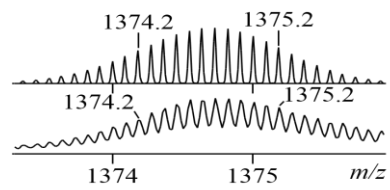

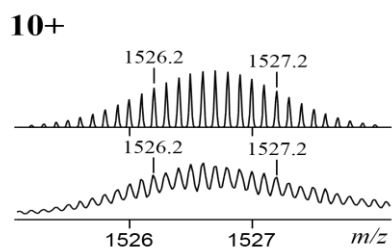

**Supplementary Figure 49:** Measured (bottom) and calculated (top) isotope patterns for the different charge states observed from  $[Fe_{10}LA_5]^{30+}$  ( $PF_6^-$  as counterion).

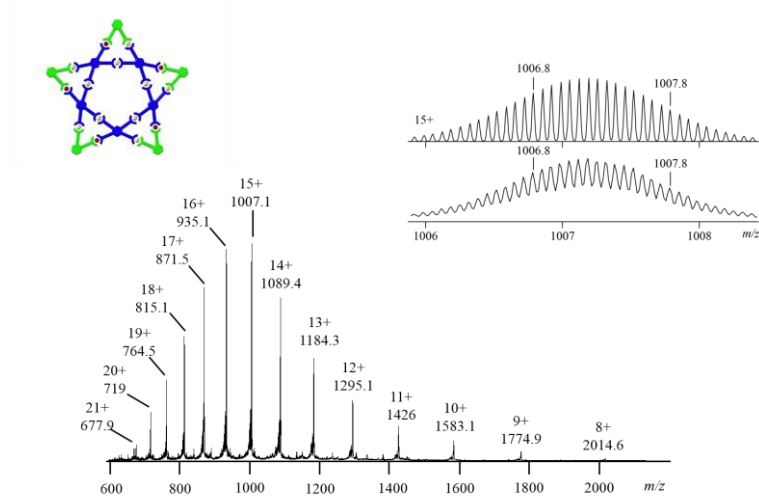

**Supplementary Figure 50:** the MS-spectrum of  $[Cd_{10}LA_5]^{30+}$  with different charge states from +8 to +21 and measured (bottom) and calculated (top) isotope patterns.

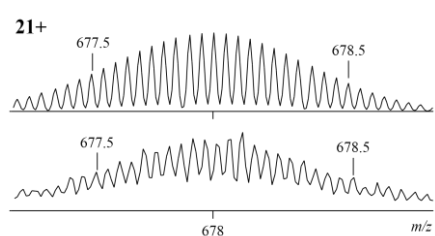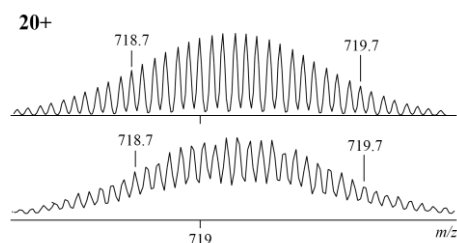

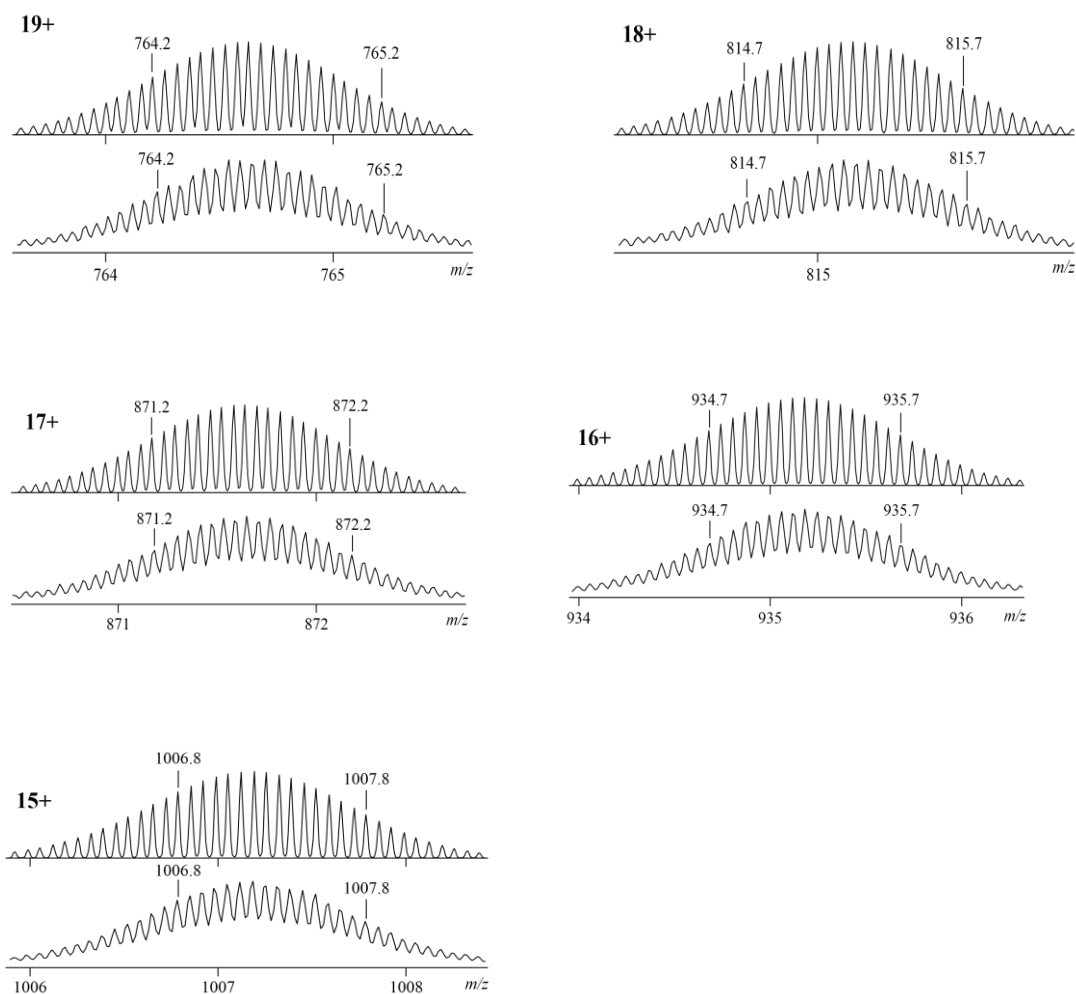

**Supplementary Figure 51:** the Measured (bottom) and calculated (top) isotope patterns for the different charge states observed from  $[Cd_{10}LA_5]^{30+}$  ( $PF_6^-$  as counterion).

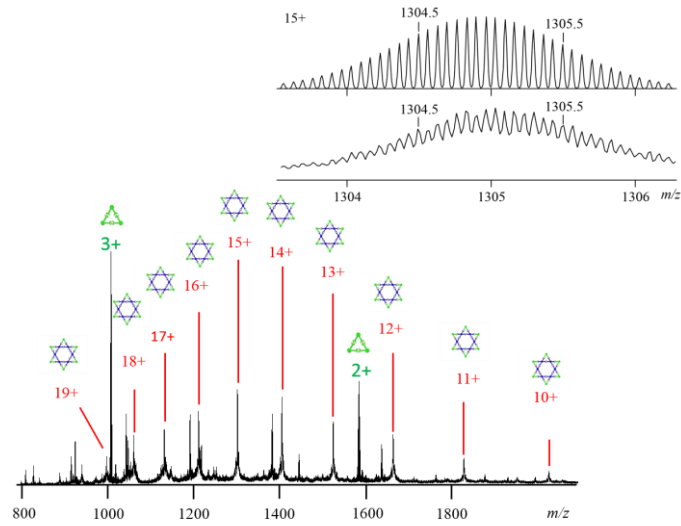

**Supplementary Figure 52:** the MS-Spectrum of  $[Cd_{12}V_3(LB)_3]^{36+}$  with different charge states from +10 to +19 and impurities triangle of  $[Cd_3V_3]^{6+}$ . Inset: measured (bottom) and calculated (top) isotope patterns of  $[Cd_{12}V_3(LB)_3]^{36+}$ .

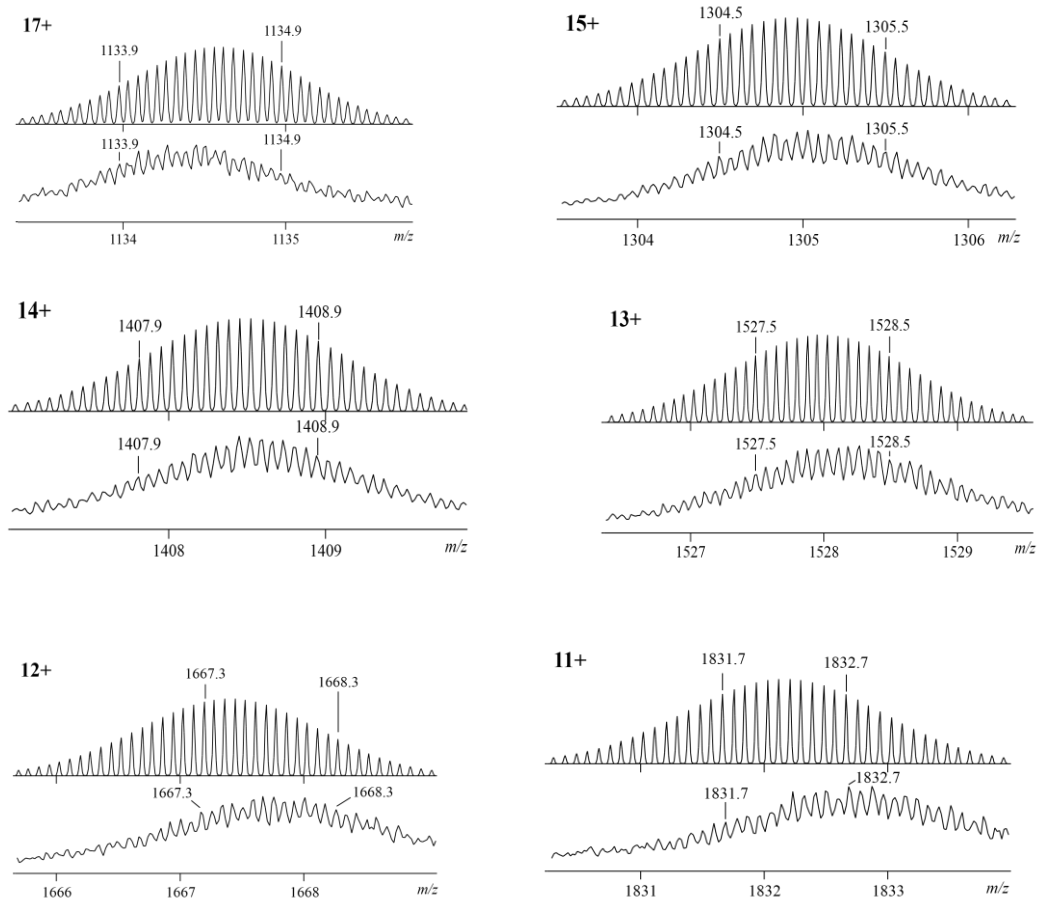

**Supplementary Figure 53:** the Measured (bottom) and calculated (top) isotope patterns of



$[Cd_{12}V_3(LB)_3]^{36+}$  for the different charge states ( $PF_6^-$  as counterion, only isotopic patterns of  $[Cd_{12}V_3(LB)_3]^{36+}$  were presented; the isotopic patterns of the metallo-triangle  $[Cd_3V_3]^{6+}$  was consistent with the published results).

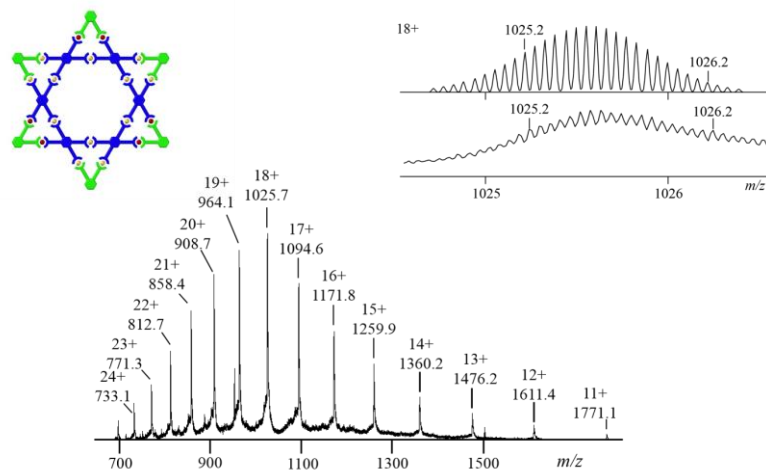

**Supplementary Figure 54:** the MS-spectrum of  $[Fe_{12}V_3(LB)_3]^{36+}$  with different charge states from +11 to +25 and the measured (bottom) and calculated (top) isotope patterns.

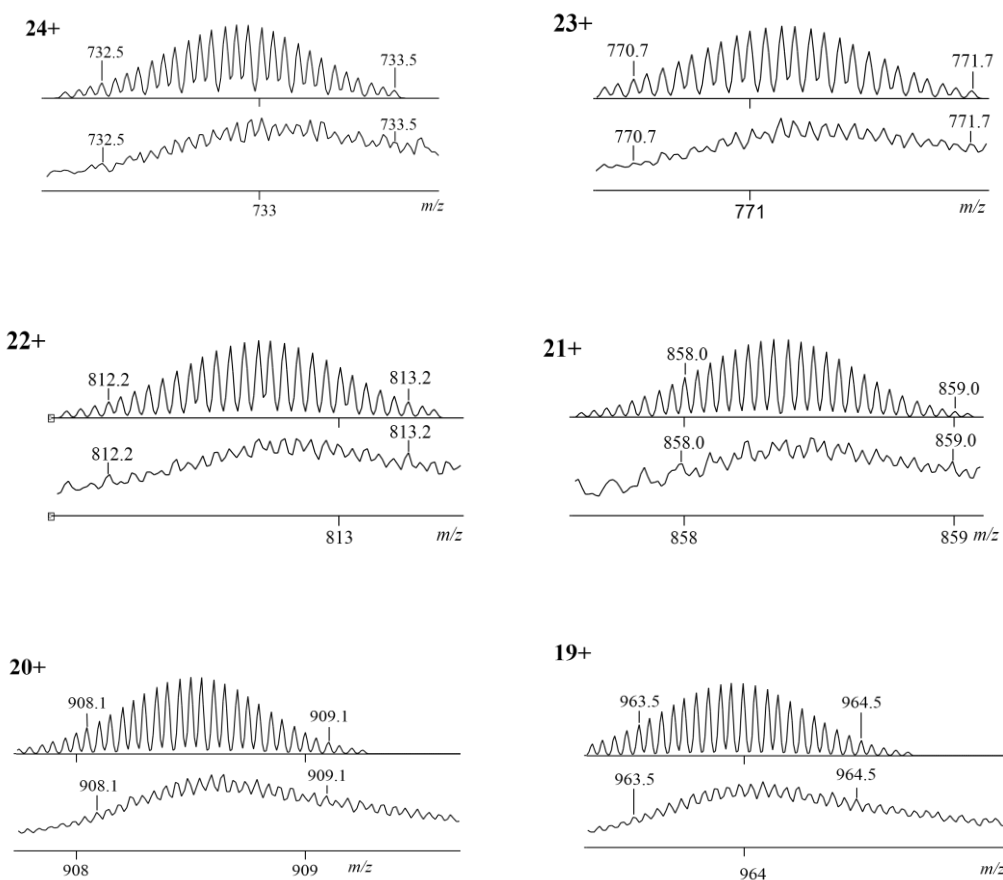

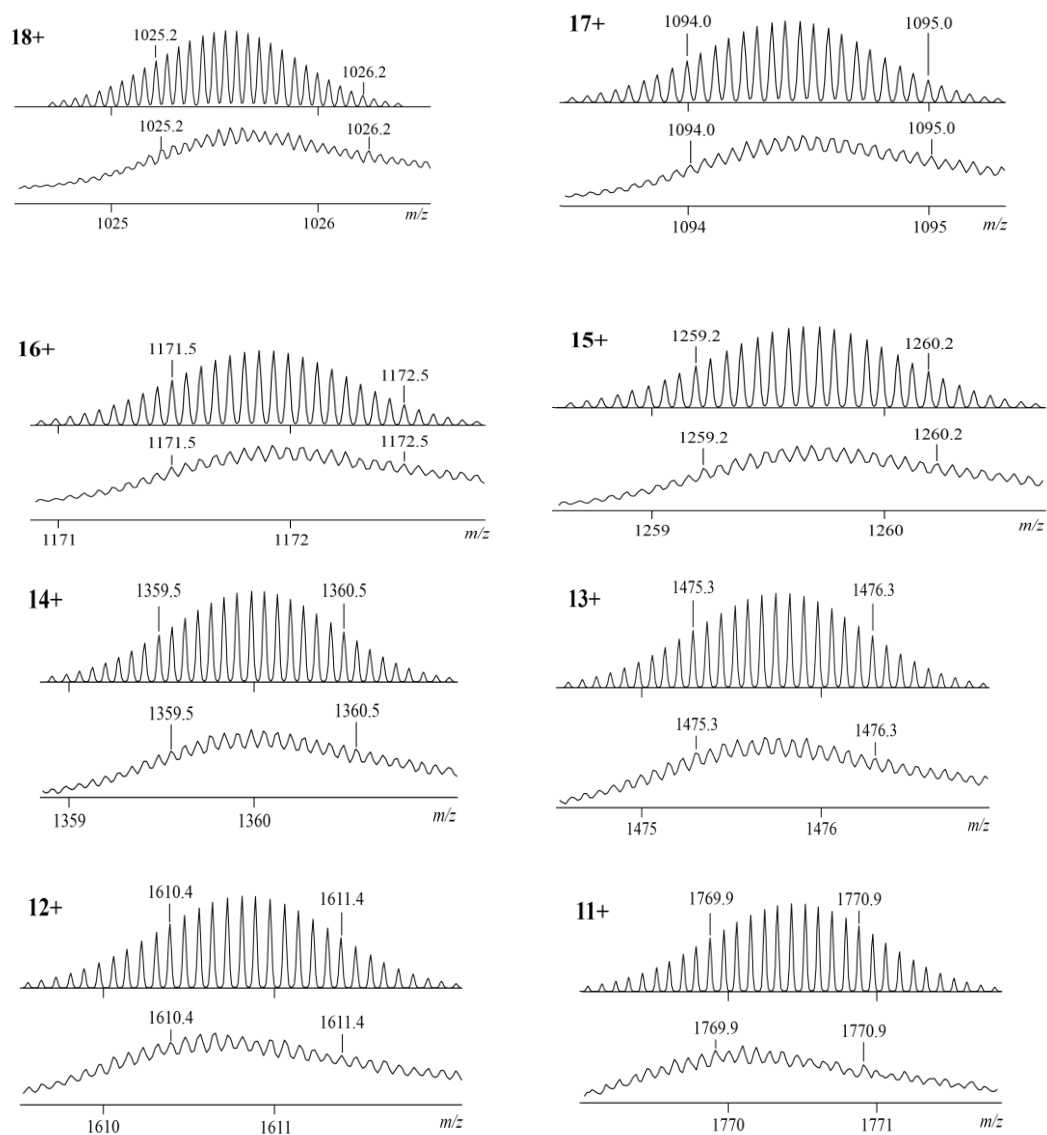

**Supplementary Figure 55:** the Measured (bottom) and calculated (top) isotope patterns for the different charge states observed from  $[Fe_{12}V_3(LB)_3]^{36+}$  ( $PF_6^-$  as counterion).

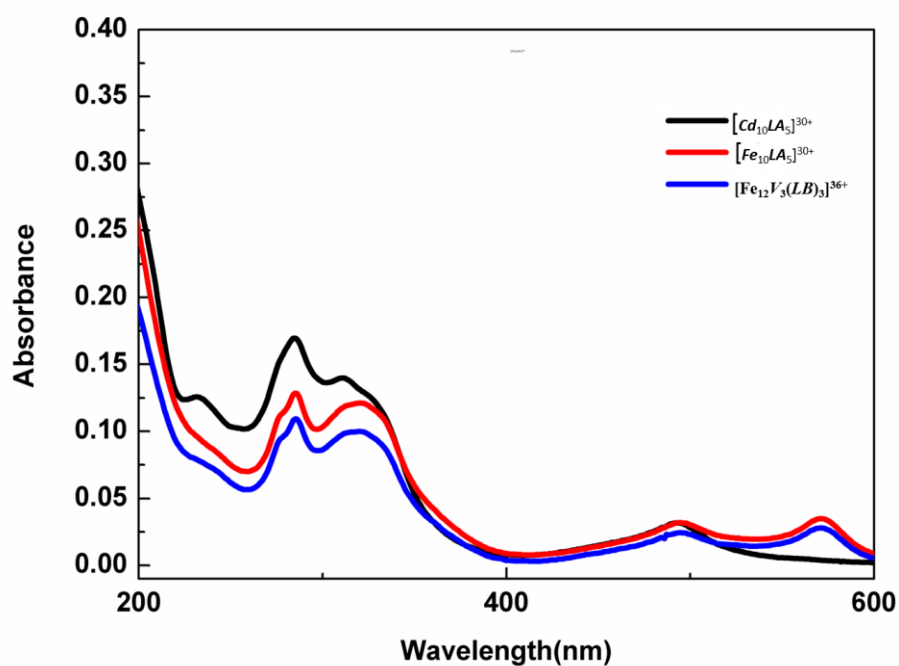

Supplementary Figure 56: The UV-vis absorption spectrum of [Cd<sub>10</sub>LA<sub>5</sub>]<sup>30+</sup>, [Fe<sub>10</sub>LA<sub>5</sub>]<sup>30+</sup>, [Fe<sub>12</sub>V<sub>3</sub>(LB)<sub>3</sub>]<sup>36+</sup> with the concentration ~10<sup>-6</sup> M in CH<sub>3</sub>CN.

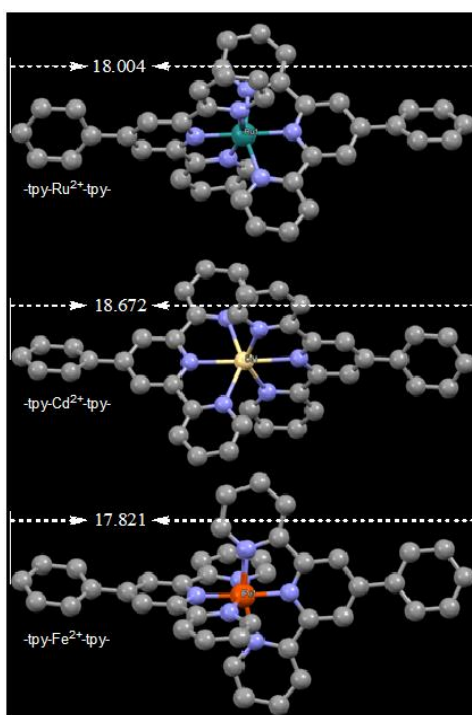

Supplementary Figure 57: Single crystal structures of tpy-Ru-tpy, tpy-Cd-tpy and tpy-Fe-tpy, and their measured lengths.<sup>S5</sup>

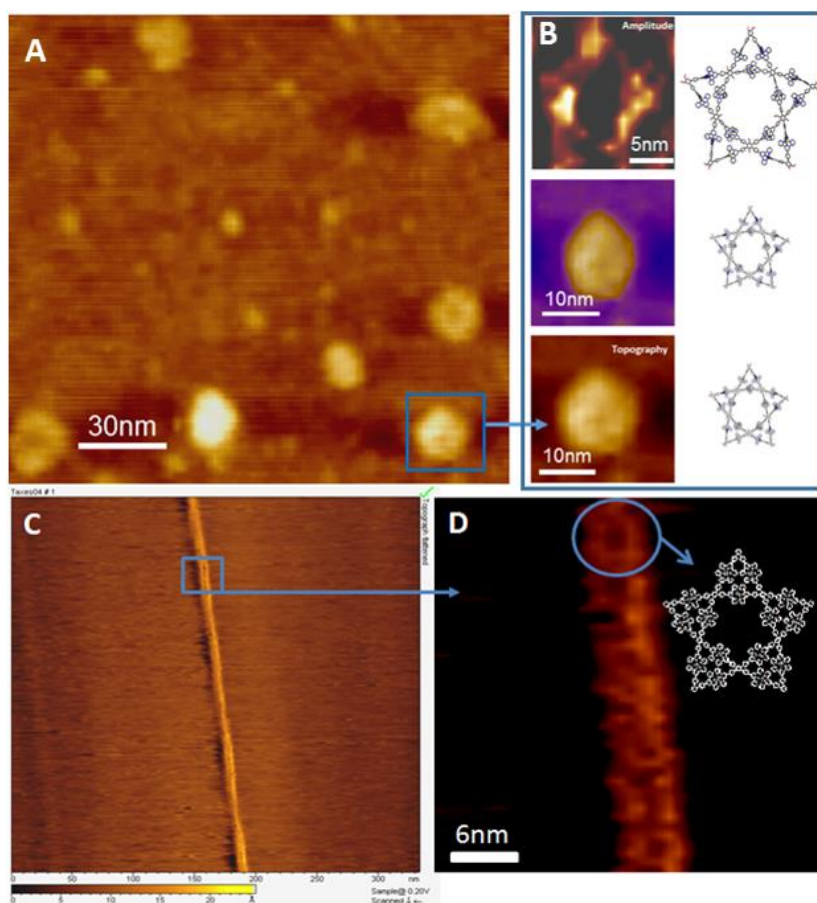

**Supplementary Figure 58:** A and B: AFM images of metallo-pentagram; C and D: STM images of metallo-pentagram.

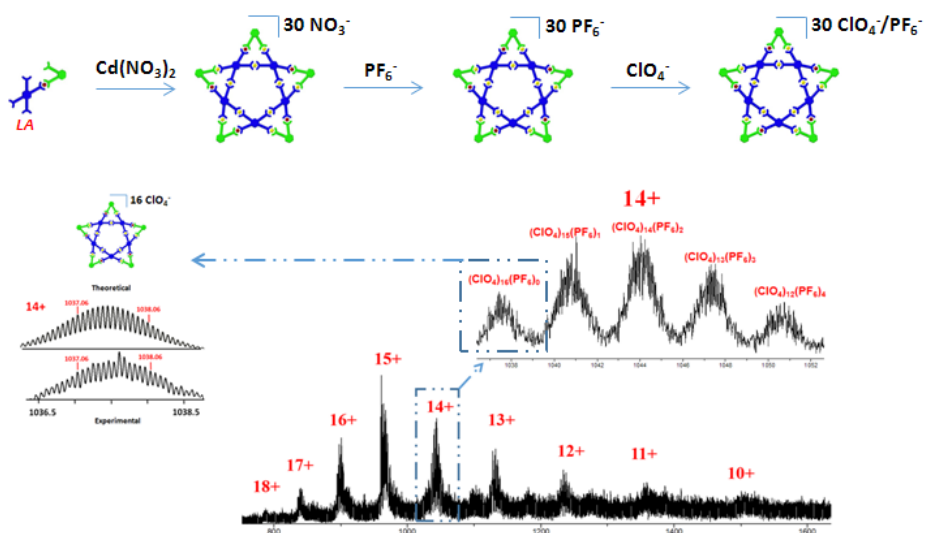

**Supplementary Figure 59:** High-resolution ESI-MS of pentagram  $[\text{Cd}_5\text{LA}_5]^{30+}$  with different anions of  $\text{NO}_3^-$ ,  $\text{PF}_6^-$  and/or  $\text{ClO}_4^-$ .

### Supplementary References:

1. A. Schultz, X. Li, B. Barkakaty, C. N. Moorefield, C. Wesdemiotis and G. R. Newkome. *J. Am. Chem. Soc.* **2012**, *134*, 7672–7675
2. Y. Li, Z. Jiang, J. Yuan, D. Liu, T. Wu, C. N. Moorefield, G. R. Newkome and P. Wang. *Chem. Commun.*, **2015**, *51*, 5766-5769.
3. T. Bauer, D. Schlüter, J. Sakamoto. *Synlett*, **2010**, *06*, 877-880.
4. J. M. Ludlow III, Z. Guo, A. Schultz, R. Sarkar, C. N. Moorefield, C. Wesdemiotis, and G. R. Newkome. *Eur. J. Inorg. Chem.* **2015**, 5662–5668.
5. E. C. Constable, C. E. Housecroft, E. A. Medlycott, M. Neuburger, F. Reinders, S. Reymann and S. Schaffner, *Inorg. Chem. Commun.*, **2008**, *11*, 805 (for **tpy-Ru-tpy**); N. W. Alcock, P. R. Barker, J. M. Haider, M. J. Hannon, C. L. Painting, Z. Pikramenou, E. A. Plummer, K. Rissanen and P. Saarenketo, *J. Chem. Soc., Dalton Trans.*, **2000**, 1447–1461 (for **tpy-Cd-tpy**); J. C. McMurtrie and I. Dance, *Cryst. Eng. Commun.*, **2009**, *11*, 1141 (for **tpy-Fe-tpy**).
6. I. Horcas, R. Fernández, J. M. Gómez-Rodríguez, J. Colchero, J. Gómez-Herrero, A. M. Baro, *Rev. Sci. Instrum.* **2007**, *78*, 013705.
